# Supplementary material
Source: ML conference proceedings conference paper supplement (https://proceedings.mlr.press/v119/sarafian20a.html)
Supplement: Supplementary file [file sarafian20a-supp.pdf]

---

## A. Theoretical Analysis

### A.1. The Mean-Gradient

**Definition 1.** The mean-gradient in a region around  $x$  of radius  $\varepsilon > 0$  is

$$g_\varepsilon(x) = \arg \min_{g \in \mathbb{R}^n} \int_{V_\varepsilon(x)} |g \cdot \tau - f(x + \tau) + f(x)|^2 d\tau \quad (1)$$

where  $V_\varepsilon(x) \subset \mathbb{R}^n$  is a convex subset s.t.  $\|x' - x\| \leq \varepsilon$  for all  $x' \in V_\varepsilon(x)$  and the integral domain is over  $\tau$  s.t.  $x + \tau \in V_\varepsilon(x)$ .

**Proposition 1** (controllable accuracy). For any twice differentiable function  $f \in \mathcal{C}^1$ , there is  $\kappa_g(x) > 0$ , so that for any  $\varepsilon > 0$  the mean-gradient satisfies  $\|g_\varepsilon(x) - \nabla f(x)\| \leq \kappa_g(x)\varepsilon$  for all  $x \in \Omega$ .

*Proof.* Recall the Taylor theorem for a twice differentiable function  $f(x + \tau) = f(x) + \nabla f(x) \cdot \tau + R_x(\tau)$ , where  $R_x(\tau)$  is the remainder. Since the gradient is continuous, by the fundamental theorem for line integrals

$$f(x + \tau) = f(x) + \int_0^1 \nabla f(x + t\tau) \cdot \tau dt = f(x) + \nabla f(x) \cdot \tau + \int_0^1 (\nabla f(x + t\tau) - \nabla f(x)) \cdot \tau dt \quad (2)$$

Since  $f \in \mathcal{C}^{1+}$ , we also have  $|\nabla f(x) - \nabla f(x + \tau)| \leq \kappa_f \|\tau\|$ . We can use this property to bound the remainder in the Taylor expression.

$$\begin{aligned} R_x(\tau) &= \int_0^1 (\nabla f(x + t\tau) - \nabla f(x)) \cdot \tau dt \\ &\leq \kappa_f \int_0^1 \|x + t\tau - x\| \cdot \|\tau\| dt = \kappa_f \|\tau\|^2 \int_0^1 t dt = \frac{1}{2} \kappa_f \|\tau\|^2 \end{aligned} \quad (3)$$

Now, by the definition of  $g_\varepsilon$ , an upper bound for  $\mathcal{L}(g_\varepsilon(x))$  is

$$\begin{aligned} \mathcal{L}(g_\varepsilon(x)) &\leq \mathcal{L}(\nabla f(x)) = \int_{V_\varepsilon(x)} |\nabla f(x) \cdot \tau - f(\tau) + f(x)|^2 d\tau = \int_{V_\varepsilon(x)} |R_x(\tau)|^2 d\tau \\ &\leq \frac{1}{4} \kappa_f^2 \int_{V_\varepsilon(x)} \|\tau\|^2 d\tau \leq \kappa_f \varepsilon^4 |V_\varepsilon(x)| = \frac{1}{4} \kappa_f^2 \varepsilon^{n+4} |V_1(x)| \end{aligned}$$

To develop the lower bound we will assume that  $\dim(\text{span}(V_\varepsilon(x))) = n$  and we will use the following definition

$$M_\varepsilon(x) = \min_{\hat{\mathbf{n}}} \int_{V_\varepsilon(x) \setminus V_{\frac{\varepsilon}{2}}(x)} \left| \frac{\tau}{\|\tau\|} \cdot \hat{\mathbf{n}} \right|^2 d\tau \quad (4)$$

where  $\hat{\mathbf{n}} \in \mathbb{R}^n$  s.t.  $\|\hat{\mathbf{n}}\| = 1$  and we assumed that  $V_{\frac{\varepsilon}{2}} \subset V_\varepsilon$ . As the dimension of  $V_\varepsilon(x)$  is  $n$ , it is obvious that  $M_\varepsilon(x) > 0$ .

The lower bound is

$$\begin{aligned}
\mathcal{L}(g_\varepsilon(x)) &= \int_{V_\varepsilon(x)} |g_\varepsilon(x) \cdot \tau - \nabla f(x) \cdot \tau + \nabla f(x) \cdot \tau - f(x + \tau) + f(x)|^2 d\tau \\
&\geq \int_{V_\varepsilon(x)} (|g_\varepsilon(x) \cdot \tau - \nabla f(x) \cdot \tau| - |\nabla f(x) \cdot \tau - f(x + \tau) + f(x)|)^2 d\tau \\
&= \int_{V_\varepsilon(x)} |g_\varepsilon(x) \cdot \tau - \nabla f(x) \cdot \tau|^2 d\tau + \int_{V_\varepsilon(x)} |\nabla f(x) \cdot \tau - f(x + \tau) + f(x)|^2 d\tau \\
&\quad - 2 \int_{V_\varepsilon(x)} |g_\varepsilon(x) \cdot \tau - \nabla f(x) \cdot \tau| \cdot |\nabla f(x) \cdot \tau - f(x + \tau) + f(x)| \tau \\
&\geq \int_{V_\varepsilon(x)} |g_\varepsilon(x) \cdot \tau - \nabla f(x) \cdot \tau|^2 d\tau - 2 \int_{V_\varepsilon(x)} |g_\varepsilon(x) \cdot \tau - \nabla f(x) \cdot \tau| \cdot |\nabla f(x) \cdot \tau - f(x + \tau) + f(x)| \tau \\
&\geq \int_{V_\varepsilon(x)} |g_\varepsilon(x) \cdot \tau - \nabla f(x) \cdot \tau|^2 d\tau - \kappa_f \int_{V_\varepsilon(x)} |g_\varepsilon(x) \cdot \tau - \nabla f(x) \cdot \tau| \cdot \|\tau\|^2 \tau \\
&\geq \|g_\varepsilon(x) - \nabla f(x)\|^2 \int_{V_\varepsilon(x)} |\hat{\mathbf{n}}(x) \cdot \tau|^2 d\tau - \kappa_f \|g_\varepsilon(x) - \nabla f(x)\| \int_{V_\varepsilon(x)} \|\tau\|^3 \tau \\
&\geq \|g_\varepsilon(x) - \nabla f(x)\|^2 \int_{V_\varepsilon(x) \setminus V_{\frac{\varepsilon}{2}}(x)} |\hat{\mathbf{n}}(x) \cdot \tau|^2 d\tau - \kappa_f \|g_\varepsilon(x) - \nabla f(x)\| \varepsilon^{n+3} |V_1(x)| \\
&\geq \|g_\varepsilon(x) - \nabla f(x)\|^2 \left(\frac{\varepsilon}{2}\right)^2 \int_{V_\varepsilon(x) \setminus V_{\frac{\varepsilon}{2}}(x)} \left| \hat{\mathbf{n}}(x) \cdot \frac{\tau}{\|\tau\|} \right|^2 d\tau - \kappa_f \|g_\varepsilon(x) - \nabla f(x)\| \varepsilon^{n+3} |V_1(x)| \\
&\geq \|g_\varepsilon(x) - \nabla f(x)\|^2 \left(\frac{\varepsilon}{2}\right)^2 \varepsilon^n \int_{V_1(x) \setminus V_{\frac{1}{2}}(x)} \left| \hat{\mathbf{n}}(x) \cdot \frac{\tau}{\|\tau\|} \right|^2 d\tau - \kappa_f \|g_\varepsilon(x) - \nabla f(x)\| \varepsilon^{n+3} |V_1(x)| \\
&\geq \frac{1}{4} \|g_\varepsilon(x) - \nabla f(x)\|^2 \varepsilon^{n+2} M_1(x) - \kappa_f \|g_\varepsilon(x) - \nabla f(x)\| \varepsilon^{n+3} |V_1(x)|
\end{aligned}$$

Combining the upper and lower bound we obtain

$$\begin{aligned}
&\frac{1}{4} \|g_\varepsilon(x) - \nabla f(x)\|^2 \varepsilon^{n+2} M_1(x) - \kappa_f \|g_\varepsilon(x) - \nabla f(x)\| \varepsilon^{n+3} |V_1(x)| \leq \frac{1}{4} \kappa_f^2 \varepsilon^{n+4} |V_1(x)| \\
\Rightarrow &M_1(x) \|g_\varepsilon(x) - \nabla f(x)\|^2 - 4\kappa_f \varepsilon |V_1(x)| \|g_\varepsilon(x) - \nabla f(x)\| - \kappa_f^2 \varepsilon^2 |V_1(x)| \leq 0 \\
\Rightarrow &\|g_\varepsilon(x) - \nabla f(x)\| \leq \varepsilon \kappa_f \frac{2|V_1(x)| + \sqrt{4|V_1(x)|^2 + |V_1(x)| M_1(x)}}{M_1(x)}
\end{aligned}$$

□

**Proposition 2** (continuity). *If  $f(x)$  is continuous in  $V$  s.t.  $V_\varepsilon(x) \subset V$ , then the mean-gradient is a continuous function at  $x$ .*

*Proof.* Let us define the two-variable function  $\mathcal{L}(x, g)$ :

$$\mathcal{L}(x, g) = \int_{V_\varepsilon(x)} |g \cdot \tau - f(x + \tau) + f(x)|^2 d\tau \tag{5}$$

The mean-gradient is the global minimum of this function for each  $x$ . Notice that  $\mathcal{L}(x, g)$  is a polynomial function in  $g$

since if  $f$  is an integrable function, then we can write

$$\begin{aligned}\mathcal{L}(x, g) &= \int_{V_\varepsilon(x)} |g \cdot \tau - f(x + \tau) + f(x)|^2 d\tau \\ &= \int_{V_\varepsilon(x)} |g \cdot \tau|^2 d\tau - 2 \int_{V_\varepsilon(x)} g \cdot \tau (f(x + \tau) - f(x)) d\tau + \int_{V_\varepsilon(x)} |f(x + \tau) - f(x)|^2 d\tau \\ &= g \cdot \mathbf{A}(x)g + g \cdot b(x) + c(x)\end{aligned}\tag{6}$$

where  $\mathbf{A}(x) = \int_{V_\varepsilon(x)} \tau \tau^T d\tau$ ,  $b(x) = -2 \int_{V_\varepsilon(x)} \tau (f(x + \tau) - f(x)) d\tau$  and  $c(x) = \int_{V_\varepsilon(x)} |f(x + \tau) - f(x)|^2 d\tau$ . Without loss of generality for this proof, we can ignore the constant  $c(x)$  as it does not change the minimum point. In addition, note that  $\mathbf{A}(x)$  is constant for all  $x$  since the domain  $V_\varepsilon(x)$  is invariant for  $x$  and the integrand does not depend on  $f$ .

Since  $\mathcal{L}(x, g)$  is bounded from below,  $\mathcal{L}(x, g) \geq 0$ , it must have a minimum s.t.  $\mathbf{A} \geq 0$ . Assume that  $\mathbf{A} > 0$  (e.g. when  $V_\varepsilon$  is an  $n$ -ball of radius  $\varepsilon$ ), then for each  $x$  there is a unique minimum for  $\mathcal{L}(x, g)$  and this minimum is the mean-gradient  $g_\varepsilon(x)$ .

To show the continuity of  $g_\varepsilon(x)$ , define  $F(x, g) = \nabla_g \mathcal{L}(x, g)$ ,  $F$  maps  $\mathbb{R}^{2n} \rightarrow \mathbb{R}^n$ . Assume that for  $x_0$ ,  $g_\varepsilon(x_0)$  is the mean-gradient. Therefore,  $F(x_0, g_\varepsilon(x_0)) = 0$ . Since  $\mathbf{A} > 0$ , this means that the derivative  $\nabla_g F(x_0, g_\varepsilon(x_0))$  is invertible. We will apply a version of the implicit function theorem (Loomis & Sternberg, 1968) (Theorem 9.3 pp. 230-231) to show that there exists a unique and continuous mapping  $h(x)$  s.t.  $F(x, h(x)) = 0$ .

To apply the implicit function theorem, we need to show that  $F(x, g)$  is continuous and the derivative  $\nabla_g F$  is continuous and invertible. The latter is obvious since  $\nabla_g F = \mathbf{A} > 0$  is a constant positive definite matrix.  $F(x, g)$  is also continuous with respect to  $g$ , therefore it is left to verify that  $F(x, g)$  is continuous with respect to  $x$ .

**Lemma A.1.** *If  $f(x)$  is continuous in  $V$  s.t.  $V_\varepsilon(x) \subset V$ , then  $\mathcal{L}(x, g)$  is continuous in  $x$ .*

*Proof.*

$$\begin{aligned}|\mathcal{L}(x, g) - \mathcal{L}(x', g)| &= |g \cdot \mathbf{A}(x)g + g \cdot b(x) - g \cdot \mathbf{A}(x')g - g \cdot b(x')| \\ &= |g \cdot b(x) - g \cdot b(x')| \leq \|g\| \left\| \int_{V_\varepsilon(x)} \tau (f(x + \tau) - f(x)) d\tau - \int_{V_\varepsilon(x')} \tau (f(x' + \tau) - f(x')) d\tau \right\|\end{aligned}\tag{7}$$

To write both integrals with the same variable, we change variables to  $\tau = \tilde{\tau} - x$  in the first integrand and  $\tau = \tilde{\tau} - x'$  in the second integrand.

$$\begin{aligned}|\mathcal{L}(x, g) - \mathcal{L}(x', g)| &\leq \|g\| \left\| \int_{V_\varepsilon(x)} (\tilde{\tau} - x)(f(\tilde{\tau}) - f(x)) d\tilde{\tau} - \int_{V_\varepsilon(x')} (\tilde{\tau} - x')(f(\tilde{\tau}) - f(x')) d\tilde{\tau} \right\| \\ &\leq \|g\| C_1 + \|g\| C_2 + \|g\| C_3 + \|g\| C_4 + \|g\| C_5\end{aligned}\tag{8}$$

Where

$$C_1 = |f(x') - f(x)| \int_{V_\varepsilon(x) \cap V_\varepsilon(x')} \|\tilde{\tau}\| d\tilde{\tau}\tag{9}$$

$$C_2 = \|x - x'\| \int_{V_\varepsilon(x) \cap V_\varepsilon(x')} |f(\tilde{\tau})| d\tilde{\tau}\tag{10}$$

$$C_3 = \|x f(x) - x' f(x')\| \int_{V_\varepsilon(x) \cap V_\varepsilon(x')} d\tilde{\tau}\tag{11}$$

$$C_4 = \int_{V_\varepsilon(x) \setminus V_\varepsilon(x')} \|\tilde{\tau} - x\| \cdot |f(\tilde{\tau}) - f(x)| d\tilde{\tau}\tag{12}$$

$$C_5 = \int_{V_\varepsilon(x') \setminus V_\varepsilon(x)} \|\tilde{\tau} - x'\| \cdot |f(\tilde{\tau}) - f(x')| d\tilde{\tau}\tag{13}$$

$$\tag{14}$$

Taking  $x' \rightarrow x$ ,  $C_1, C_2, C_3$  all go to zero as the integral is finite but  $x' \rightarrow x$  and  $f(x') \rightarrow f(x)$ . For  $C_4$  and  $C_5$ , note that the integrand is bounded but the domain size goes to zero as  $x' \rightarrow x$ . To see that we will show that  $|V_\varepsilon(x) \setminus V_\varepsilon(x')| \leq |A_\varepsilon(x)| \cdot \|x - x'\|$ , where  $|A_\varepsilon(x)|$  is the surface area of  $V_\varepsilon$ .

**Lemma A.2.**  $|V_\varepsilon(x) \setminus V_\varepsilon(x')| \leq |A_\varepsilon(x)| \cdot \|x - x'\|$

*Proof.* First, note that if  $u \in V_\varepsilon(x)$ , then  $u + x' - x \in V_\varepsilon(x')$ . Take  $P \subset V_\varepsilon$  s.t.  $p \in P$  if and only if  $\text{distance}(A_\varepsilon(x), p) \geq \|x - x'\|$  and  $p \in V_\varepsilon(x)$ . For any  $p \in P$ ,  $p - x + x' \in V_\varepsilon(x)$ , thus, following our first argument  $p \in V_\varepsilon(x')$ .

We obtain that  $P \cap V_\varepsilon(x) \setminus V_\varepsilon(x') = \Phi$ , thus  $|V_\varepsilon(x) \setminus V_\varepsilon(x')| \leq |V_\varepsilon(x) \setminus P|$ . However, all points  $q \in V_\varepsilon(x) \setminus P$  satisfy  $\text{distance}(A_\varepsilon(x), q) \leq \|x - x'\|$ , therefore  $|V_\varepsilon(x) \setminus P| \leq |A_\varepsilon(x)| \cdot \|x - x'\|$ .  $\square$

Following Lemma A.2 we obtain that the integral in  $C_4$  and  $C_5$  goes to zero and therefore the distance  $|\mathcal{L}(x, g) - \mathcal{L}(x', g)| \rightarrow 0$  as  $x \rightarrow x'$ .  $\square$

$\mathcal{L}(x, g)$  continuous in  $x$  and  $g$  with a continuous derivative in  $g$  implies that  $\nabla_g \mathcal{L}(x, g)$  is continuous in  $x$ . We can now apply Theorem 9.3 pp. 230-231 in (Loomis & Sternberg, 1968) and conclude that there is a unique continuous mapping  $h(x)$  s.t.  $F(x, h(x)) = 0$ . Since  $A > 0$ , this means that such a mapping defines a local minimum for  $\mathcal{L}(x, g)$  in  $g$ . Further, since  $\mathcal{L}(x, g)$  is a second degree polynomial in  $g$ , this is a unique global mapping. Therefore, it must be equal to  $g_\varepsilon(x)$  and hence  $g_\varepsilon$  is continuous in  $x$ .  $\square$

## A.2. Parametric approximation of the mean-gradient

In this section we analyze the Monte-Carlo learning of the mean-gradient with a parametric model. Generally, we define a parametric model  $g_\theta$  and learn  $\theta^*$  by minimizing the term

$$\mathcal{L}(g_\theta, \varepsilon) = \sum_{i=1}^N \sum_{x_j \in V_\varepsilon(x_i)} |(x_j - x_i) \cdot g_\theta(x_i) - y_j + y_i|^2 \quad (15)$$

We start by analyzing constant parameterization of the mean-gradient around a candidate  $x_k$ . We consider two cases: (1) interpolation, where there are exactly  $n + 1$  evaluation points; and (2) regression where there are  $m > n + 1$  evaluation points. This line of arguments follows the same approach taken in (Audet & Hare, 2017), Chapter 9.

### A.2.1. CONSTANT PARAMETERIZATION WITH $n + 1$ INTERPOLATION POINTS

**Definition A.1.** A set of  $n + 1$  points  $\{x_i\}_0^n$ , s.t. every subset of  $n$  points spans  $\mathbb{R}^n$ , is a poised set for constant interpolation.

**Proposition A.1.** For a constant parameterization  $g(x) = g$ , a poised set has a unique solution with zero regression error.

$$\min_g \sum_{i,j \in \mathcal{D}} |(x_j - x_i) \cdot g - y_j + y_i|^2 = 0 \quad (16)$$

*Proof.* Define the matrix  $\tilde{X}_i \in \mathbb{M}^{n \times n}$  s.t. the  $j$ -th row is  $x_i - x_j$  and  $\delta_i \in \mathbb{R}^n$  s.t.  $\delta_{i,j} = y_j - y_i$ . We may transform Eq. (16) into  $n + 1$  sets of linear equations:

$$\forall i \quad \tilde{X}_i g = \delta_i \quad (17)$$

While there are  $n + 1$  different linear systems of equations, they all have the same solution  $g_{\min}$ . To see that, define the system of equation  $\tilde{X} \tilde{g} = r$  where

$$\tilde{X} = \begin{pmatrix} x_0 & 1 \\ x_1 & 1 \\ \vdots & \vdots \\ x_n & 1 \end{pmatrix}, \quad g = \begin{pmatrix} g_0 \\ g_1 \\ \vdots \\ g_{n-1} \\ s \end{pmatrix}, \quad r = \begin{pmatrix} y_0 \\ y_1 \\ \vdots \\ y_n \end{pmatrix} \quad (18)$$

and  $s$  is an additional slack variable. For all  $i$  we can apply an elementary row operation of subtracting the  $i$ -th row s.t. the updated system is

$$\left( \begin{array}{cc|c} x_0 - x_i & 0 & y_0 - y_i \\ \vdots & \vdots & \vdots \\ x_{i-1} - x_i & 0 & y_{i-1} - y_i \\ 0 & 0 & 0 \\ x_{i+1} - x_i & 0 & y_{i+1} - y_i \\ \vdots & \vdots & \vdots \\ x_n - x_i & 0 & y_n - y_i \end{array} \right) \quad (19)$$

Reducing the zeroed  $i$ -th row we get the system of equation  $\tilde{X}_i g = \delta_i$  which has a unique solution since the set  $\{x_j\} \setminus x_i$  spans  $\mathbb{R}^n$ .  $\square$

**Corollary A.1.** *For any parameterization of the form  $g_\theta = f(Wx) + b$  and a poised set  $\{x_j\}_0^n$  we have an optimal solution where  $W^* = 0$  and  $b^* = g_{\min}$ . Specifically it also holds for a Neural Network with a biased output layer.*

**Lemma A.3.** *For a poised set  $\{x_j\}_0^n$  s.t.  $\|x_i - x_j\| \leq \varepsilon$  and a mean-gradient estimator  $g_\theta \in \mathcal{C}^0$  with zero interpolation error, the following holds*

$$\|\nabla f(x) - g_\theta(x)\| \leq \kappa_g \varepsilon \quad (20)$$

*Proof.*  $f \in \mathcal{C}^{1+}$ , hence for any  $x_i$  in the poised set and  $x$  s.t.  $\|x - x_i\| \leq \varepsilon$  we have

$$\begin{aligned} \|\nabla f(x) - g_\theta(x)\| &\leq \\ \|\nabla f(x) - \nabla f(x_i)\| + \|\nabla f(x_i) - g_\theta(x_i)\| + \|g_\theta(x_i) - g_\theta(x)\| &\leq (\kappa_f + \kappa_{g_\theta})\varepsilon + \|\nabla f(x_i) - g_\theta(x_i)\| \end{aligned} \quad (21)$$

Where  $\kappa_{g_\theta}$  is the Lipschitz constant of  $g_\theta$  it is left to bound the last term. First, note that for all  $x_j$  in the poised set we have that

$$(x_j - x_i) \cdot g_\theta(x_i) = f(x_j) - f(x_i) \leq (x_j - x_i) \cdot \nabla f(x_i) + \frac{1}{2} \kappa_f \varepsilon^2 \quad (22)$$

where the last equation comes from the second error term in the Taylor series expansion in  $x_i$  (see Proposition A.1). Returning to our definition of  $\tilde{X}_i$  (see proposition A.1) we can write

$$\|\tilde{X}_i(\nabla f(x_i) - g_\theta(x_i))\| = \sqrt{\sum_i |(x_j - x_i) \cdot (g_\theta(x_i) - \nabla f(x_i))|^2} \leq \frac{1}{2} \sqrt{n} \kappa_f \varepsilon^2 \quad (23)$$

Using that property we have

$$\|\nabla f(x_i) - g_\theta(x_i)\| = \|\tilde{X}_i^{-1} \tilde{X}_i(\nabla f(x_i) - g_\theta(x_i))\| \leq \|\tilde{X}_i^{-1}\| \|\tilde{X}_i(\nabla f(x_i) - g_\theta(x_i))\| \leq \frac{1}{2} \sqrt{n} \kappa_f \|\tilde{X}_i^{-1}\| \varepsilon^2. \quad (24)$$

$\|\tilde{X}_i^{-1}\| = \frac{1}{\min \sigma(\tilde{X}_i)}$ , where  $\sigma$  is the singular values. Notice that the rows of  $\tilde{X}_i$  are  $x_j - x_i \propto \varepsilon$ , thus we can scale them by  $\varepsilon$ . In this case, since the poised set spans  $\mathbb{R}^n$ , the minimal singular value of  $\frac{1}{\varepsilon} \tilde{X}_i$  is finite and does not depend on  $\varepsilon$ . Therefore, we obtain

$$\|\nabla f(x_i) - g_\theta(x_i)\| \leq \frac{1}{2} \sqrt{n} \left\| \left( \frac{1}{\varepsilon} \tilde{X}_i \right)^{-1} \right\| \kappa_f \varepsilon = O(n\varepsilon) \quad (25)$$

Therefore,

$$\|\nabla f(x) - g_\theta(x)\| \leq \left( \kappa_f + \frac{1}{2} \sqrt{n} \kappa_{g_\theta} + \left\| \left( \frac{1}{\varepsilon} \tilde{X}_i \right)^{-1} \right\| \kappa_f \right) \varepsilon \quad (26)$$

$\square$

Notice that we only required  $g_\theta$  to be a zero-order Lipschitz continuous and we do not set any restrictions on its gradient. For Neural Networks, having the  $\mathcal{C}^0$  property is relatively easy, e.g. with spectral normalization (Miyato et al., 2018). However, many NNs are not  $\mathcal{C}^1$ , e.g. NN with ReLU activations.

---

### A.2.2. CONSTANT PARAMETERIZATION WITH $m > n + 1$ REGRESSION POINTS

We can extend the results of Sec. A.2.1 to the regression problem where we have access to  $m > n + 1$  points  $\{x_i\}_0^{m-1}$ . We wish to show that the bounds for a constant mean-gradient solution for the regression problem in Eq. (15) are also controllably accurate, i.e.  $\|\nabla f(x) - g\| \leq \kappa_g \varepsilon$ . As in the interpolation case, we start with the definition of the poised set for regression.

**Definition 2** (poised set for regression). *Let  $\mathcal{D}_k = \{(x_i, y_i)\}_1^m$ ,  $m \geq n + 1$  s.t.  $x_i \in V_\varepsilon(x_k)$  for all  $i$ . Define the matrix  $\tilde{X}_i \in \mathbb{M}^{m \times n}$  s.t. the  $j$ -th row is  $x_i - x_j$ . Now define  $\tilde{X} = (\tilde{x}_1^T \dots \tilde{x}_m^T)^T$ . The set  $\mathcal{D}_k$  is a poised set for regression in  $x_k$  if the matrix  $\tilde{X}$  has rank  $n$ .*

Intuitively, a set is poised if its difference vectors  $x_i - x_j$  span  $\mathbb{R}^n$ . For the poised set, and a constant parameterization, the solution of Eq. (27) is unique and it equals to the Least-Squares (LS) minimizer. If  $f$  has a Lipschitz continuous gradient, then the error between  $g_\varepsilon(x)$  and  $\nabla f(x)$  is proportional to  $\varepsilon$ . We formalize this argument in the next proposition.

**Theorem 1.** *Let  $\mathcal{D}_k$  be a poised set in  $V_\varepsilon(x_k)$ . The regression problem*

$$g^{MSE} = \arg \min_g \sum_{i,j \in \mathcal{D}_k} |(x_j - x_i) \cdot g - y_j + y_i|^2 \quad (27)$$

has the unique solution  $g^{MSE} = (\tilde{X}^T \tilde{X})^{-1} \tilde{X}^T \delta$ , where  $\delta \in \mathbb{R}^{m^2}$  s.t.  $\delta_{i \cdot (m-1) + j} = y_j - y_i$ . Further, if  $f \in \mathcal{C}^{1+}$  and  $g_\theta \in \mathcal{C}^0$  is a parameterization with lower regression loss  $g^{MSE}$ , the following holds

$$\|\nabla f(x) - g_\theta(x)\| \leq \kappa_g \varepsilon \quad (28)$$

*Proof.* The regression problem can be written as

$$g = \arg \min_g \|\tilde{X}g - \delta\|^2 \quad (29)$$

This is the formulation for the mean-square error problem with matrix  $\tilde{X}$  and target  $\delta$ . The minimizer of this function is the standard mean-square error minimizer which is unique as  $\tilde{X}$  has rank  $n$ .

$$g = (\tilde{X}^T \tilde{X})^{-1} \tilde{X}^T \delta \quad (30)$$

**Lemma A.4.** *Let  $f \in \mathcal{C}^{1+}$  on  $B_\varepsilon(x_j)$  with a Lipschitz constant  $\kappa_f$ . For any triplet  $x_i, x_j, x_k$  s.t.  $\|x_i - x_j\| \leq \varepsilon$  and  $\|x_k - x_j\| \leq \varepsilon$*

$$|f(x_k) - f(x_j) - (x_k - x_j) \cdot \nabla f(x_i)| \leq \frac{3}{2} \kappa_f \varepsilon^2 \quad (31)$$

*Proof.*

$$\begin{aligned} |f(x_k) - f(x_j) - (x_k - x_j) \cdot \nabla f(x_i)| &= \left| \int_0^1 (x_k - x_j) \cdot \nabla f(x_j + \tau(x_k - x_j)) d\tau - (x_k - x_j) \cdot \nabla f(x_i) \right| \\ &= \left| \int_0^1 (x_k - x_j) \cdot (\nabla f(x_j + \tau(x_k - x_j)) - \nabla f(x_i)) d\tau \right| \\ &\leq \left| \int_0^1 \|x_k - x_j\| \cdot \|\nabla f(x_j + \tau(x_k - x_j)) - \nabla f(x_i)\| d\tau \right| \\ &\leq \kappa_f \varepsilon \left| \int_0^1 \|x_j + \tau(x_k - x_j) - x_i\| d\tau \right| \\ &\leq \kappa_f \varepsilon \left| \int_0^1 \|x_j - x_i\| + \|\tau(x_k - x_j)\| d\tau \right| \\ &\leq \kappa_f \varepsilon \left| \varepsilon + \varepsilon \int_0^1 \tau d\tau \right| \\ &= \frac{3}{2} \kappa_f \varepsilon^2 \end{aligned} \quad (32)$$

□

Applying the previous Lemma, for all  $x \in V_\varepsilon(x_k)$

$$\|\tilde{X}\nabla f(x) - \delta\|^2 = \sum_{k=0}^{m-1} \sum_{j=0}^{m-1} |(x_k - x_j)^T \nabla f(x) - (f(x_k) - f(x_j))|^2 \leq m^2 \left( \frac{3}{2} \kappa_f \varepsilon^2 \right)^2 \quad (33)$$

hence  $\|\tilde{X}\nabla f(x) - \delta\| \leq \frac{3m}{2} \kappa_f \varepsilon^2$ .

Notice also that if  $\mathcal{D}_k$  is a poised set s.t. the matrix  $\tilde{X}$  has rank  $n$  s.t.  $\tilde{X}^\dagger = (\tilde{X}^T \tilde{X})^{-1} \tilde{X}^T$  exists and we have that

$$\|\nabla f(x) - \tilde{X}^\dagger \delta\| = \left\| \tilde{X}^\dagger \left( \tilde{X} \nabla f(x) - \delta \right) \right\| \leq \|\tilde{X}^\dagger\| \cdot \|\tilde{X} \nabla f(x) - \delta\| \leq \|\tilde{X}^\dagger\| \frac{3m}{2} \kappa_f \varepsilon^2 \quad (34)$$

As in the interpolation case, we can multiply  $\tilde{X}^\dagger$  by  $\varepsilon$  to obtain a matrix which is invariant to the size of  $\varepsilon$ . Denote the scaled pseudo-inverse as  $\tilde{X}^\ddagger = \varepsilon (\tilde{X}^T \tilde{X})^{-1} \tilde{X}^T$ . Therefore,

$$\|\nabla f(x) - g^{MSE}\| \leq \|\tilde{X}^\ddagger\| \frac{3m}{2} \kappa_f \varepsilon \quad (35)$$

If  $g_\theta$  has a lower regression error than  $g^{MSE}$ , then there exists at least one point  $x_i$  s.t.  $x_i \in \mathcal{D}_k$  and  $\|\nabla f(x_i) - g_\theta(x_i)\| \leq \|\nabla f(x_i) - g^{MSE}\|$ . In this case we have

$$\begin{aligned} \|\nabla f(x) - g_\theta(x)\| &\leq \|\nabla f(x) - \nabla f(x_i)\| + \|\nabla f(x_i) - g_\theta(x_i)\| + \|g_\theta(x_i) - g_\theta(x)\| \\ &\leq (\kappa_f + \kappa_{g_\theta})\varepsilon + \|\nabla f(x_i) - g_\theta(x_i)\| \\ &\leq (\kappa_f + \kappa_{g_\theta})\varepsilon + \|\nabla f(x_i) - g^{MSE}\| \\ &\leq (\kappa_f + \kappa_{g_\theta})\varepsilon + \|\tilde{X}^\ddagger\| \frac{3m}{2} \kappa_f \varepsilon \\ &= \left( \kappa_f + \kappa_{g_\theta} + \|\tilde{X}^\ddagger\| \frac{3m}{2} \kappa_f \right) \varepsilon \end{aligned}$$

□

**Corollary 1.** For the  $\mathcal{D}_k$  poised set, any Lipschitz continuous parameterization of the form  $g_\theta(x) = F(Wx) + b$ , specifically NNs, is a controllably accurate model in  $V_\varepsilon(x_k)$  for the optimal set of parameters  $\theta^*$ .

### A.3. Convergence Analysis

For clarity, we replace the subscript  $\theta$  in  $g_\theta$  and write  $g_\varepsilon$  to emphasize that our model for the mean-gradient is controllably accurate.

**Theorem 2.** Let  $f : \Omega \rightarrow \mathbb{R}$  be a function with Lipschitz continuous gradient, i.e.  $f \in \mathcal{C}^1$  and a Lipschitz constant  $\kappa_f$ . Suppose a controllable mean-gradient model  $g_\varepsilon$  with error constant  $\kappa_g$ , the gradient descent iteration  $x_{k+1} = x_k - \alpha g_\varepsilon(x_k)$  with  $\alpha$  s.t.  $\frac{5\varepsilon}{\|\nabla f(x_k)\|} \leq \alpha \leq \min(\frac{1}{\kappa_g}, \frac{1}{\kappa_f})$  guarantees a monotonically decreasing step s.t.  $f(x_{k+1}) \leq f(x_k) - 2.25 \frac{\varepsilon^2}{\alpha}$ .

*Proof.* For  $f \in \mathcal{C}^1$  the following inequality holds for all  $x_k$  (see proof in Proposition A.1)

$$f(x) \leq f(x_k) + (x - x_k) \cdot \nabla f(x_k) + \frac{1}{2} \kappa_f \|x - x_k\|^2 \quad (36)$$

Plugging in the iteration update  $x_{k+1} = x_k - \alpha g_\varepsilon(x_k)$  we get

$$f(x_{k+1}) \leq f(x_k) - \alpha g_\varepsilon(x_k) \cdot \nabla f(x_k) + \alpha^2 \frac{1}{2} \kappa_f \|g_\varepsilon(x_k)\|^2 \quad (37)$$

For a controllable mean-gradient we can write  $\|g_\varepsilon(x) - \nabla f(x)\| \leq \varepsilon \kappa_g$ , therefore we can write  $g_\varepsilon(x) = \nabla f(x) + \varepsilon \kappa_g \xi(x)$  s.t.  $\|\xi(x)\| \leq 1$  so the inequality is

$$f(x_{k+1}) \leq f(x_k) - \alpha \|\nabla f(x_k)\|^2 - \alpha \varepsilon \kappa_g \xi(x_k) \cdot \nabla f(x_k) + \alpha^2 \frac{1}{2} \kappa_f \|\nabla f(x_k) + \varepsilon \kappa_g \xi(x_k)\|^2 \quad (38)$$

Using the equality  $\|a + b\|^2 = \|a\|^2 + 2a \cdot b + \|b\|^2$  and the Cauchy-Schwartz inequality  $a \cdot b \leq \|a\| \|b\|$  we can write

$$\begin{aligned} f(x_{k+1}) &\leq f(x_k) - \alpha \|\nabla f(x_k)\|^2 + \alpha \varepsilon \kappa_g \|\xi(x_k)\| \cdot \|\nabla f(x_k)\| + \alpha^2 \frac{1}{2} \kappa_f (\|\nabla f(x_k)\|^2 + 2\varepsilon \kappa_g \|\xi(x_k)\| \cdot \|\nabla f(x_k)\| + \varepsilon^2 \kappa_g^2 \|\xi(x_k)\|^2) \\ &\leq f(x_k) - \alpha \|\nabla f(x_k)\|^2 + \alpha \varepsilon \kappa_g \|\nabla f(x_k)\| + \frac{\alpha^2}{2} \kappa_f \|\nabla f(x_k)\|^2 + \alpha^2 \kappa_f \varepsilon \kappa_g \|\nabla f(x_k)\| + \frac{\alpha^2 \varepsilon^2}{2} \kappa_f \kappa_g^2 \end{aligned} \quad (39)$$

Using the requirement  $\alpha \leq \min(\frac{1}{\kappa_g}, \frac{1}{\kappa_f})$  it follows that  $\alpha \kappa_g \leq 1$  and  $\alpha \kappa_f \leq 1$  so

$$\begin{aligned} f(x_{k+1}) &\leq f(x_k) - \alpha \|\nabla f(x_k)\|^2 + \varepsilon \|\nabla f(x_k)\| + \frac{\alpha}{2} \|\nabla f(x_k)\|^2 + \varepsilon \|\nabla f(x_k)\| + \frac{\varepsilon^2}{2} \kappa_g \\ &= f(x_k) - \frac{\alpha}{2} \|\nabla f(x_k)\|^2 + 2\varepsilon \|\nabla f(x_k)\| + \frac{\varepsilon^2}{2} \kappa_g \end{aligned} \quad (40)$$

Now, for  $\alpha$  s.t.  $\alpha \geq \frac{5\varepsilon}{\|\nabla f(x_k)\|}$  then  $\varepsilon \leq \|\nabla f(x_k)\| \frac{\alpha}{5}$ . Plugging it to our inequality we obtain

$$\begin{aligned} f(x_{k+1}) &\leq f(x_k) - \frac{\alpha}{2} \|\nabla f(x_k)\|^2 + \frac{2\alpha}{5} \|\nabla f(x_k)\|^2 + \frac{\alpha^2}{100} \kappa_g \|\nabla f(x_k)\|^2 \\ &\leq f(x_k) - \frac{\alpha}{2} \|\nabla f(x_k)\|^2 + \frac{2\alpha}{5} \|\nabla f(x_k)\|^2 + \frac{\alpha}{100} \|\nabla f(x_k)\|^2 \\ &= f(x_k) - 0.09\alpha \|\nabla f(x_k)\|^2 \\ &\leq f(x_k) - 2.25 \frac{\varepsilon^2}{\alpha} \end{aligned} \quad (41)$$

Therefore, we obtain a monotonically decreasing step with finite size improvement, hence after a finite number of steps we obtain  $x^*$  for which  $\|\nabla f(x^*)\| \leq \frac{5\varepsilon}{\alpha}$ .  $\square$

**Corollary 2.** When Theorem 2 is satisfied for all  $k$ , the gradient descent iteration converges to a stationary point  $x^*$  s.t.  $\frac{1}{K} \sum_{k=1}^K \|\nabla f(x_k)\|^2 \leq \frac{12|f(x_0) - f(x^*)|}{\alpha_K K}$ .

*Proof.* Recall that for all  $k$  we have

$$f(x_{k+1}) \leq f(x_k) - 0.09\alpha_k \|\nabla f(x_k)\|^2 \Rightarrow \|\nabla f(x_k)\|^2 \leq \frac{12}{\alpha_k} (f(x_k) - f(x_{k+1})) \quad (42)$$

Summing over these terms we obtain

$$\sum_{k=0}^{K-1} \|\nabla f(x_k)\|^2 \leq \sum_{k=0}^{K-1} \frac{12}{\alpha_k} (f(x_k) - f(x_{k+1})) \leq \frac{12}{\alpha_K} \sum_{k=0}^{K-1} (f(x_k) - f(x_{k+1})) = \frac{12}{\alpha_K} (f(x_0) - f(x_K)) \quad (43)$$

Since the domain is bounded and the gradient is Lipschitz continuous, from the fundamental theorem of line integral it follows that the function is bounded. Hence, a monotonically decreasing sequence bounded from below, must converge to the sequence infimum denoted as  $x^*$ . Therefore,

$$\sum_{k=0}^{K-1} \|\nabla f(x_k)\|^2 \leq \frac{12}{\alpha_K} |f(x_0) - f(x_K)| \leq \frac{12}{\alpha_K} |f(x_0) - f(x^*)| \quad (44)$$

$\square$



## B. The Perturbed Mean-Gradient

**Definition B.1.** The perturbed mean-gradient in  $x$  with averaging radius  $\varepsilon > 0$  and perturbation radius  $p < \varepsilon$  is

$$g_\varepsilon^p(x) = \arg \min_{g \in \mathbb{R}^n} \iint_{V_\varepsilon(x)B_p(x)} |g \cdot (\tau - s) - f(\tau) + f(s)|^2 ds d\tau \quad (45)$$

where  $B_p(x) \subset V_\varepsilon(x) \subset \mathbb{R}^n$  are convex subsets s.t.  $\|x' - x\| \leq \varepsilon$  for all  $x' \in V_\varepsilon(x)$  and the integral domain is over  $\tau \in V_\varepsilon(x)$  and  $s \in B_p(x)$ .

We denote  $V_\varepsilon(x)$  as the averaging domain and  $B_p(x)$  as the perturbation domain and usually set  $|V_\varepsilon| \gg |B_p|$ . The purpose of  $V_\varepsilon$  is to average the gradient in a region of radius  $\varepsilon$  and the perturbation is required to obtain smooth gradients around discontinuity points.

**Proposition B.1** (controllable accuracy). For any function  $f \in \mathcal{C}^1$ , there is  $\kappa_g > 0$ , so that for any  $\varepsilon > 0$  the perturbed mean-gradient satisfies  $\|g_\varepsilon^p - \nabla f(x)\| \leq \kappa_g \varepsilon$  for all  $x \in \Omega$ .

*Proof.* Recall the Taylor theorem for a twice differentiable function  $f(\tau) = f(s) + \nabla f(s) \cdot (\tau - s) + R_s(\tau)$ , where  $R_s(\tau)$  is the reminder. Since the gradient is continuous, we can write

$$f(\tau) = f(s) + \nabla f(s) \cdot (\tau - s) + \int_0^1 (\nabla f(s + t(\tau - s)) - \nabla f(s)) \cdot (\tau - s) dt \quad (46)$$

Since  $f \in \mathcal{C}^1$ , we also have  $|\nabla f(x) - \nabla f(s)| \leq \kappa_f \|x - s\|$ . We can use this property to bound the reminder in the Taylor expression.

$$\begin{aligned} R_s(\tau) &= \int_0^1 (\nabla f(s + t(\tau - s)) - \nabla f(s)) \cdot (\tau - s) dt \\ &\leq \kappa_f \int_0^1 \|s + t(\tau - s) - s\| \cdot \|\tau - s\| dt \leq \frac{\kappa_f}{2} \|\tau - s\|^2 \end{aligned} \quad (47)$$

By the definition of  $g_\varepsilon^p$ , an upper bound for  $\mathcal{L}(g_\varepsilon^p(x))$  is

$$\begin{aligned} \mathcal{L}(g_\varepsilon(x)) &\leq \mathcal{L}(\nabla f(x)) = \iint_{V_\varepsilon(x)B_p(x)} |\nabla f(x) \cdot (\tau - s) - f(\tau) + f(s)|^2 ds d\tau \\ &= \iint_{V_\varepsilon(x)B_p(x)} |(\nabla f(x) - \nabla f(s) + \nabla f(s)) \cdot (\tau - s) - f(\tau) + f(s)|^2 ds d\tau \\ &\leq \iint_{V_\varepsilon(x)B_p(x)} |\nabla f(s) \cdot (\tau - s) - f(\tau) + f(s)|^2 ds d\tau \\ &\quad + 2 \iint_{V_\varepsilon(x)B_p(x)} \|\nabla f(x) - \nabla f(s)\| \cdot \|\tau - s\| \cdot |\nabla f(s) \cdot (\tau - s) - f(\tau) + f(s)| ds d\tau \\ &\quad + \iint_{V_\varepsilon(x)B_p(x)} \|\nabla f(x) - \nabla f(s)\|^2 \cdot \|\tau - s\|^2 ds d\tau \\ &\leq \iint_{V_\varepsilon(x)B_p(x)} \frac{\kappa_f^2}{4} \|\tau - s\|^4 + \kappa_f^2 \|x - s\| \cdot \|\tau - s\|^3 + \kappa_f^2 \|x - s\| \cdot \|\tau - s\|^2 ds d\tau \\ &\leq 16\kappa_f^2 \varepsilon^4 |V_\varepsilon(x)| |B_p(x)| = 16\kappa_f^2 \varepsilon^{n+4} p^n |V_1(x)| |B_1(x)| \end{aligned}$$

Noticed that we used the inequalities: (1)  $\|\nabla f(x) - \nabla f(s)\| \leq \kappa_f \|x - s\| \leq \kappa_f \varepsilon$ , (2)  $\|x - s\| \leq \varepsilon$ ; and (3)  $\|\tau - s\| \leq 2\varepsilon$ .

For the lower bound we assume that  $p = \varepsilon \bar{p}$  and  $\bar{p} < \frac{1}{4}$ . Note that for any other upper bound on  $\bar{p}$  we can derive an alternative bound.

The lower bound is

$$\begin{aligned}
\mathcal{L}(g_\varepsilon(x)) &= \iint_{V_\varepsilon(x) \setminus B_p(x)} |g_\varepsilon(x) \cdot (\tau - s) - f(\tau) + f(s)|^2 ds d\tau \\
&= \iint_{V_\varepsilon(x) \setminus B_p(x)} |(g_\varepsilon(x) - \nabla f(x) + \nabla f(x)) \cdot (\tau - s) - f(\tau) + f(s)|^2 ds d\tau \\
&\geq \iint_{V_\varepsilon(x) \setminus B_p(x)} |(g_\varepsilon(x) - \nabla f(x)) \cdot (\tau - s)|^2 - 2|(g_\varepsilon(x) - \nabla f(x)) \cdot (\tau - s)| \cdot |\nabla f(x) - f(\tau) + f(s)| ds d\tau \\
&\geq \iint_{V_\varepsilon(x) \setminus V_{\frac{3\varepsilon}{4}}(x) \setminus B_p(x)} |(g_\varepsilon(x) - \nabla f(x)) \cdot (\tau - s)|^2 ds d\tau \\
&\quad - 4\varepsilon \|(g_\varepsilon(x) - \nabla f(x))\| \iint_{V_\varepsilon(x) \setminus B_p(x)} (|\nabla f(s) - f(\tau) + f(s)| + |\nabla f(x) - \nabla f(s)|) ds d\tau \\
&\geq \|(g_\varepsilon(x) - \nabla f(x))\|^2 \left(\frac{\varepsilon}{2}\right)^2 \iint_{V_\varepsilon(x) \setminus V_{\frac{3\varepsilon}{4}}(x) \setminus B_p(x)} \left| \hat{\mathbf{n}}(x) \cdot \frac{\tau - s}{\|\tau - s\|} \right|^2 ds d\tau \\
&\quad - 4\varepsilon \|(g_\varepsilon(x) - \nabla f(x))\| \iint_{V_\varepsilon(x) \setminus B_p(x)} \frac{1}{2} \kappa_f \|\tau - s\|^2 + \kappa_f \|x - s\|^2 ds d\tau \\
&\geq \|(g_\varepsilon(x) - \nabla f(x))\|^2 \varepsilon^n p^n \left(\frac{\varepsilon}{2}\right)^2 \iint_{V_1(x) \setminus V_{\frac{3}{4}}(x) \setminus B_1(x)} \left| \hat{\mathbf{n}}(x) \cdot \frac{\tau - s}{\|\tau - s\|} \right|^2 ds d\tau - 2.5\varepsilon \|(g_\varepsilon(x) - \nabla f(x))\| \varepsilon^n p^n \kappa_f \frac{27}{32} \varepsilon^2 |V_1(x)| |B_1(x)| \\
&= \frac{1}{4} \varepsilon^{n+2} p^n M_1 \|(g_\varepsilon(x) - \nabla f(x))\|^2 - 2.5\varepsilon^{n+3} p^n \kappa_f \|(g_\varepsilon(x) - \nabla f(x))\| |V_1(x)| |B_1(x)|
\end{aligned}$$

Combining the lower and upper bound we obtain

$$\begin{aligned}
&M_1 \|(g_\varepsilon(x) - \nabla f(x))\|^2 - 10\varepsilon \kappa_f \|(g_\varepsilon(x) - \nabla f(x))\| |V_1(x)| |B_1(x)| - 64\kappa_f^2 \varepsilon^2 |V_1(x)| |B_1(x)| \leq 0 \\
\Rightarrow \|(g_\varepsilon(x) - \nabla f(x))\| &\leq \kappa_g \varepsilon
\end{aligned}$$

where

$$\kappa_g = \kappa_f \frac{10|V_1(x)| |B_1(x)| + \sqrt{100|V_1(x)|^2 |B_1(x)|^2 + 256|V_1(x)| |B_1(x)| M_1(x)}}{M_1(x)}$$

□

**Proposition B.2** (continuity). *If  $f(x)$  is Riemann integrable in  $V_\varepsilon(x) \subset V$  then the perturbed mean-gradient is a continuous function at  $x$ .*

*Proof.* We follow the same line of arguments as in Proposition 2, yet here we need to show that  $\mathcal{L}(x, g)$  is continuous for any interable function  $f$ .

---


$$\begin{aligned}
|\mathcal{L}(x, g) - \mathcal{L}(x', g)| &= |g \cdot \mathbf{A}(x)g + g \cdot b(x) - g \cdot \mathbf{A}(x')g - g \cdot b(x)| = |g \cdot b(x) - g \cdot b(x)| \\
&\leq \|g\| \left\| \iint_{V_\varepsilon(x)B_p(x)} |g \cdot (\tau - s) - f(\tau) + f(s)|^2 ds d\tau - \iint_{V_\varepsilon(x')B_p(x')} |g \cdot (\tau - s) - f(\tau) + f(s)|^2 ds d\tau \right\| \\
&\leq \|g\| \iint_{V_\varepsilon(x)B_p(x) \setminus V_\varepsilon(x')B_p(x')} |g \cdot (\tau - s) - f(\tau) + f(s)|^2 ds d\tau \\
&\quad + \|g\| \iint_{V_\varepsilon(x')B_p(x') \setminus V_\varepsilon(x)B_p(x)} |g \cdot (\tau - s) - f(\tau) + f(s)|^2 ds d\tau \\
&\leq M \|g\| \cdot |V_\varepsilon(x)B_p(x) \setminus V_\varepsilon(x')B_p(x')| + M \|g\| \cdot |V_\varepsilon(x')B_p(x') \setminus V_\varepsilon(x)B_p(x)|
\end{aligned}$$

Applying the same arguments in Lemma A.2, we have  $|V_\varepsilon(x)B_p(x) \setminus V_\varepsilon(x')B_p(x')| \leq |A_{V_\varepsilon}(x)| \cdot |A_{B_p}(x)| \|x - x'\|^2$ , where  $A_{V_\varepsilon}(x)$  is the surface of  $V_\varepsilon(x)$  and  $A_{B_p}(x)$  is the surface of  $B_p(x)$ . Therefore,  $\mathcal{L}(x, g)$  is continuous.

The rest of the proof, again, is identical to Proposition 2.

□

### B.1. Monte-Carlo approximation of the perturb mean-gradient

For a parameterization  $g_\theta$ , we may learn the perturb mean-gradient by sampling a reference point  $x_r$  and then uniformly sampling two evaluation points  $x_i \sim U(B_p(x_r))$   $x_j \sim U(V_\varepsilon(x_r))$ . With the tuples  $(x_r, x_i, x_j)$  we minimize the following loss

$$\mathcal{L}_{\varepsilon, p}(\theta) = \sum_{x_r} \sum_{x_i} \sum_{x_j} |g_\theta(x_r) \cdot (x_j - x_i) - f(x_j) + f(x_i)|^2$$

Since  $x_i \sim U(B_p(x_r))$ , we can write  $x_i = x_r + n_i$  where  $n_i$  is uniformly sampled in an  $n$ -ball with  $p$  radius. To reduce the number of evaluation points, we may choose to fix  $x_i$  and sample  $x_r = x_i + n_r$ . If we assume that  $\varepsilon \gg p$  then for a sample  $x_j \sim U(V_\varepsilon(x_i))$  with very high probability we have that  $\|x_r - x_j\| \leq \varepsilon$ . So we can approximate  $\mathcal{L}_{\varepsilon, p}$  with

$$\mathcal{L}_{\varepsilon, p}(\theta) = \sum_{n_r} \sum_{x_i} \sum_{x_j} |g_\theta(x_i + n_r) \cdot (x_j - x_i) - f(x_j) + f(x_i)|^2$$

---

## C. Spline Embedding

When fitting  $f$  with a NN, we found out that feeding the input vector  $x$  directly into a Fully Connected NN provides unsatisfactory results when the dimension of the data is too small or when the target function is too complex. Specifically, gradient descent (with Adam optimizer (Kingma & Ba, 2014)) falls short in finding the global optimum. We did not investigate theoretically into this phenomena, but we designed an alternative architecture that significantly improves the learning process. This method adds a preceding embedding layer (Zhang et al., 2016) before the NN. These embeddings represent a set of learnable Spline functions (Reinsch, 1967).

Categorical Feature embedding (Howard & Guggler, 2020) is a strong, common practice, method to learn representations of multi-categorical information. It is equivalent to replacing the features with their corresponding one-hot vector representation and concatenating the one-hot vectors into a single vector which is then fed to the input of a NN. An important advantage of categorical embedding is the ability to expand the input dimension into an arbitrary large vector size. In practice, this expansion can help in representing complex non-linear problems.

For ordinal data, however, embedding may be viewed as an unnecessary step as one can feed the data directly into a NN input layer. Moreover, categorical feature embeddings do not preserve ordinality within each categorical variable as each class is assigned a different independent set of learnable embeddings. Nevertheless, motivated by the ability to expand the input dimension into an arbitrary large number, we designed an ordinal variable embedding that is Lipschitz continuous s.t. for two relatively close inputs  $x_1$  and  $x_2$  the embedding layer outputs  $s(x_1)$  and  $s(x_2)$  s.t.  $\|s(x_1) - s(x_2)\| \leq \kappa_s \|x_1 - x_2\|$ . To that end, for a given input vector  $x \in \mathbb{R}^n$ , we define the representation as  $s_\theta : \mathbb{R}^n \rightarrow \mathbb{R}^{n_s}$ ,  $y = s_\theta(x)$ , where each entry  $s_\theta^j(x^l)$  is a one-dimensional learnable Spline transformation. A Spline (Reinsch, 1967) is a piecewise polynomial with some degree of smoothness in the connection points. Spline is usually used to approximate smooth functions but here we use it to represent a learnable function.

To define a learnable spline, we need to determine the intersection points and the spline degree. Specifically, for a domain  $x^i \in [a, b]$  we equally divided the domain into  $k$  intersection points, where each point is also termed as knot (in this work  $[a, b] = [-1, 1]$  and  $k = 21$ , s.t. each segment is 0.1 long). Our next step is to define the spline degree and smoothness. We experimented with three options: (1) continuous piecewise linear splines (2) 3<sup>rd</sup> degree polynomials with continuous second derivative, termed  $C^2$  Cubic spline and; (3) continuous  $C^0$  Cubic splines. We found out that for the purpose of EGL, continuous piecewise linear splines yield the best performance and requires less computational effort. The explicit definition of a piecewise linear spline is

$$s(x, \theta) = \frac{\theta_i}{h_i}(x - t_{i-1}) + \frac{\theta_i}{h_i}(t_i - x) \quad (48)$$

where  $\theta$  is a  $k$  elements ( $k$  is the number of knots),  $t_i$  is the location of the  $i$ -th knot and  $h_i = t_i - t_{i-1}$ .

We can learn more than a single spline for each element in the  $x$  vector. In this work we learned  $e$  different splines for each entry in  $x$  s.t. the output shape of the embedding block is  $n \times e$ . It is also possible to learn two or more dimensional splines but the number of free parameters grows to the power of the splines dimensions. Therefore, it is non practical to calculate these high degree splines. To calculate interactions between different entries of  $x$  we tested two different methods: (1) aggregation functions and; (2) attention aggregation after a non-local blocks (Wang et al., 2018).

In the first option, given a spline representation  $s(x) \in \mathbb{R}^{n \times e}$  an average pooling aggregation is executed along the 1<sup>st</sup> dimension s.t. we end up with a  $\bar{s}(x) \in \mathbb{R}^e$  representation vector. In the second option, the aggregation takes place after a non-local blocks which calculates interactions between each pairs of entries in the 1<sup>st</sup> dimension of  $s(x)$  (i.e. the input dimension). To preserve the information of the input data, we concatenated  $x$  to the output of the aggregation layer. After the concatenation, stacks of Residual blocks (He et al., 2016) (Res-Blocks) layers have been applied to calculate the output vector (size of 1 in IGL and size of  $n$  in EGL). The complete Spline Embedding architecture that includes both average pooling aggregation and non-local blocks is presented in Fig. 1.

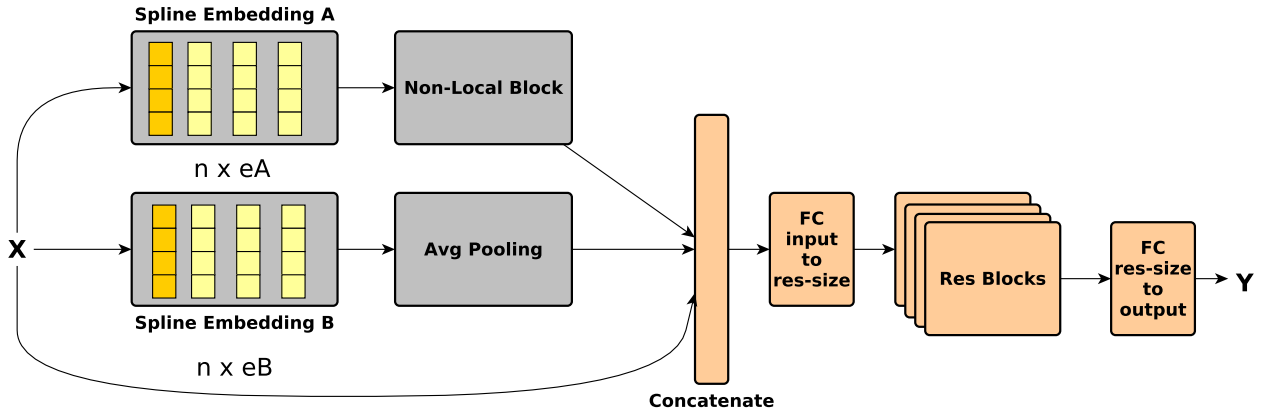

Figure 1. The Spline Architecture

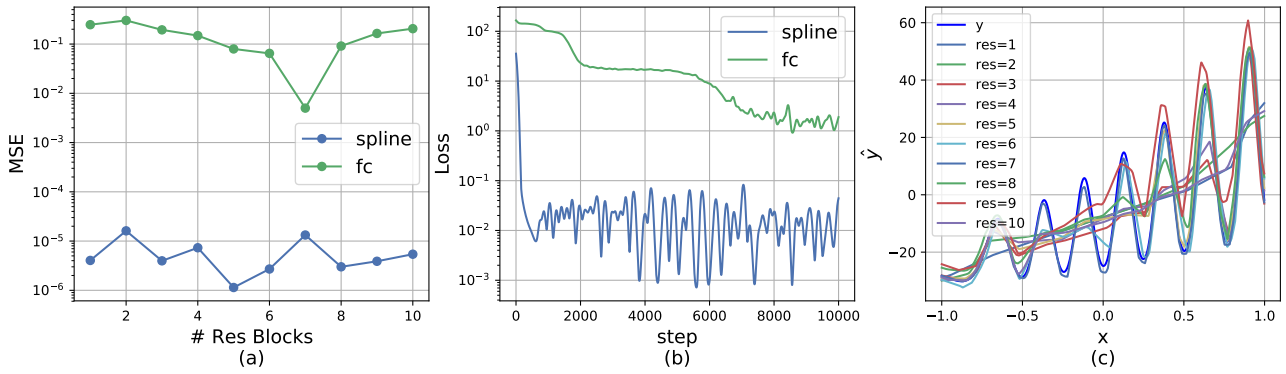

Figure 2. Comparing Spline fitting vs standard FC fitting.

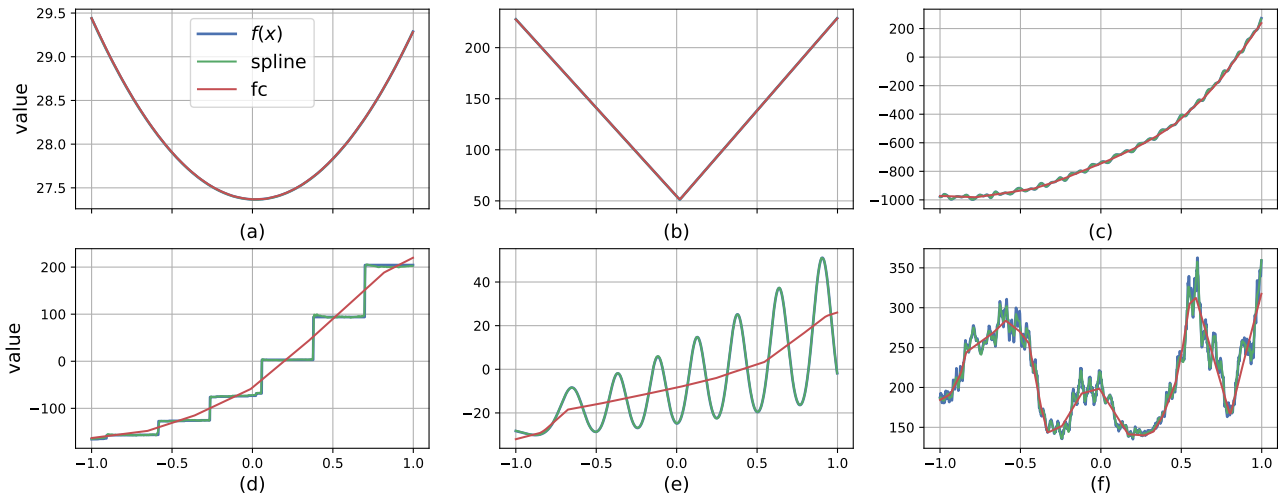

Figure 3. Comparing Spline fitting vs standard FC fitting.

---

In the next set of experiments, we evaluate the benefit of Spline embedding in 1D COCO problems. We compared the Spline architecture in Fig. 1 to the same architecture without the spline embedding branches ( $x$  is directly fed to the FC layer input). We used only  $e = 8$  splines and a Res-Block layer size of 64. In Fig. 2(a), we evaluate the learning of a single problem (246, harmonic decaying function) with different number of Res-Blocks. Here, we used a mini-batch size of 1024 and a total of 1024 mini-batches iteration to learn the function (i.e. a total of  $10^6$  samples). We see that Spline embedding obtains much better MSE even for a single Res-Block and maintains its advantage for all the Res-Block sizes which we evaluated. Note that each Res-Block comprises two Fully Connected layers, thus with the additional input and output layers we have  $2n + 2$  FC layers for  $n$  Res-Blocks.

In Fig. 2(b) we evaluated the learning process with 2 Res-Blocks for 10240 mini-batches ( $10^7$  samples). We see that Spline embedding converges after roughly 500 minibatches while the FC layer learns very slowly. Interestingly, each significant drop in the loss function of the FC net corresponds to a fit of a different ripple in the harmonic decaying function. It seems like the FC architecture converges to local minima that prevent the network from fitting the entire harmonic function. This can be seen in Fig. 2(c) where we print the results of the learned FC models for different Res-Block sizes after 1024 mini-batches. The results show that all FC networks fail to fit the harmonic function completely.

To demonstrate expressiveness of Spline embedding, we fit the 4 functions in the 1-D illustrative examples in Sec. 3 and two additional functions: the harmonic decaying function and a noise like function. The results are presented in Fig. 3. Remarkably, while we use only  $e = 8$  splines which sums up to only 680 additional weights ( $8 \times 21$  spline parameters and additional  $8 \times 64$  input weights), we obtain significantly better results than the corresponding FC architecture.<sup>1</sup>

---

<sup>1</sup>In 1D problems there is no aggregation step.

## D. Mappings

By applying the chain rule and the inverse function theorem, we can express the gradient of the original problem  $\nabla f$  with the gradient of the scaled problem  $\nabla \tilde{f}$ :

$$\frac{\partial f(x)}{\partial x^l} = \left( \frac{\partial r_k}{\partial y} \right)^{-1} \frac{\partial h_j(x)}{\partial x^l} \frac{\partial \tilde{f}_{jk}(\tilde{x})}{\partial \tilde{x}^l} \quad (49)$$

Here,  $\partial x^l$  is the partial derivative with respect to the  $l$ -th entry of  $x$  (we assume that  $h$  maps each element independently s.t. the Jacobian of  $h$  is diagonal). For strictly linear mappings, it is easy to show that this property also holds for the mean-gradients.

**Proposition D.1.** *Let  $h_j : \mathbb{R}^n \rightarrow \mathbb{R}^n$  and  $r_k : \mathbb{R} \rightarrow \mathbb{R}$  be two linear mapping functions s.t.,  $r_k(y) = \frac{y - \mu_k}{\sigma_k}$  and  $h_j^l(x) = a_j^l x + b_j^l$ , then the mean-gradient  $g_\varepsilon$  of  $f$  can be recovered from the mean-gradient  $\tilde{g}_\varepsilon$  of  $\tilde{f}$  with*

$$g_\varepsilon^l(x) = \frac{a_j^l}{\sigma_k} \tilde{g}_\varepsilon^l(\tilde{x}) \quad (50)$$

where  $V_\varepsilon$  is the projection  $h_j^{-1}(V_\varepsilon)$  which is bounded by an  $n$ -ball at  $x$  with radius  $\varepsilon = \max_l \frac{1}{a_j^l} \tilde{\varepsilon}$ , i.e. for all  $x' \in V_\varepsilon(x)$ ,  $\|x' - x\| \leq \max_l \frac{1}{a_j^l} \tilde{\varepsilon}$ .

*Proof.* Let us write the definition of  $g_\varepsilon$  with a variable  $\tilde{\tau}$  s.t.  $\tilde{\tau} \in V_\varepsilon(\tilde{x})$  (contrary to the original definition where  $\tau$  denoted the difference s.t.  $x + \tau \in V_\varepsilon(x)$ )

$$g_\varepsilon(\tilde{x}) = \arg \min_g \int_{\tilde{\tau} \in V_\varepsilon(\tilde{x})} |g \cdot (\tilde{\tau} - \tilde{x}) - \tilde{f}(\tilde{\tau}) + \tilde{f}(\tilde{x})|^2 d\tilde{\tau} \quad (51)$$

Recall the mapping  $\tilde{x} = h(x)$ , since it is invertable mapping, there exist  $\tau$  s.t.  $\tilde{\tau} = h(\tau)$ . Substituting  $\tilde{\tau}$  with  $\tau$ , the integral becomes

$$g_\varepsilon(\tilde{x}) = \arg \min_g \int_{\tau \in h^{-1}(V_\varepsilon(\tilde{x}))} |g \cdot (h(\tau) - h(x)) - \tilde{f}(h^{-1}(\tau)) + \tilde{f}(h^{-1}(x))|^2 |\det(Dh(\tau))| d\tau \quad (52)$$

where  $\det(Dh(\tau))$  denotes the determinant of the Jacobian matrix of the mapping  $h$ . This determinant is constant for linear mapping so we can ignore it as we search for the arg-min value. We can also multiply the integral by the inverse slope  $\frac{1}{\sigma_r}$  and get

$$\begin{aligned} g_\varepsilon(\tilde{x}) &= \arg \min_g \int_{\tau \in h^{-1}(V_\varepsilon(\tilde{x}))} \left| \frac{1}{\sigma_r} g \cdot (h(\tau) - h(x)) - \frac{1}{\sigma_r} \tilde{f}(h^{-1}(\tau)) + \frac{1}{\sigma_r} \tilde{f}(h^{-1}(x)) \right|^2 d\tau \\ &= \arg \min_g \int_{\tau \in h^{-1}(V_\varepsilon(\tilde{x}))} \left| \frac{1}{\sigma_r} a_j \odot g \cdot (\tau - x) - r^{-1}(\tilde{f}(h^{-1}(\tau))) + r^{-1}(\tilde{f}(h^{-1}(x))) \right|^2 d\tau \\ &= \arg \min_g \int_{\tau \in h^{-1}(V_\varepsilon(\tilde{x}))} \left| \frac{1}{\sigma_r} a_j \odot g \cdot (\tau - x) - f(\tau) + f(x) \right|^2 d\tau \end{aligned} \quad (53)$$

Where the last equality holds since  $r^{-1} \circ \tilde{f} \circ h = r^{-1} \circ r \circ f \circ h^{-1} \circ h = f$ . Since the mapping  $g \rightarrow \frac{1}{\sigma_r} a_j \odot g$  is bijective, the arg-min can be rephrased as

$$\frac{1}{\sigma_r} a_j \odot g_\varepsilon(\tilde{x}) = \arg \min_g \int_{\tau \in h^{-1}(V_\varepsilon(\tilde{x}))} |g \cdot (\tau - x) - f(\tau) + f(x)|^2 d\tau \quad (54)$$

which is exactly the definition for  $g_\varepsilon$  so we get that  $g_\varepsilon = \frac{1}{\sigma_r} a_j \odot g_\varepsilon(\tilde{x})$ , as requested. Finally, we need to show that for all  $\tau \in V_\varepsilon(x)$ ,  $\|\tau - x\| \leq \max_l \frac{1}{a^l} \tilde{\varepsilon}$ .

$$\|\tau - x\| = \|h^{-1}(\tilde{\tau}) - h^{-1}(\tilde{x})\| = \|h^{-1}(\tilde{\tau} - \tilde{x})\| \leq \|h^{-1}\| \|\tilde{\tau} - \tilde{x}\| \leq \max_l \frac{1}{a^l} \tilde{\varepsilon} \quad (55)$$

□

---

As discussed in Sec. 4.3, the design goals for mappings are twofold: (1) Fix the statistics of the input and output data and; (2) maintain the linearity as much as possible. Following these two goals we explored mappings of the form  $y = q(l_{\mathbf{a}}(x))$ , where  $q$  is an expansion non-linear mapping  $\Omega \rightarrow \mathbb{R}^n$  for the input mapping and a squash mapping  $\mathbb{R} \rightarrow \mathbb{R}$  for the output mapping.  $l_{\mathbf{a}}$  is a linear mapping that is defined by the  $\mathbf{a}$  parameters. For example in the scalar case we can uniquely define the linear function by mapping  $x_1$  to  $y_1$  and  $x_2$  to  $y_2$ , in this case we denote  $\mathbf{a} = [(x_1, y_1), (x_2, y_2)]$ .

### D.1. Input Mapping

Given a candidate solution  $x_{j-1}$ , we first construct a bounding-box  $\Omega_j$  by squeezing the previous region by a factor of  $\gamma_\alpha$  and placing it s.t.  $x_{j-1}$  is in the bounding-box center. For a region  $\Omega_j$  such that the upper and lower bounds are found in  $[b_l, b_u]$ , we, first, construct a linear mapping of the form  $\mathbf{a} = [(b_l, -1), (b_u, 1)]$ . Then, our expansion function is the inverse hyperbolic tangent  $\text{arctanh}(x) = \frac{1}{2} \log\left(\frac{1+x}{1-x}\right)$ . This function expands  $[-1, 1] \rightarrow \mathbb{R}$  but maintains linearity at the origin. Given that the solution is approximately found in the center of the bounding-box we obtain high linearity except when the solution is found on the edges.

### D.2. Output Mapping

For the output mapping we first fix the statistics with a linear mapping  $\mathbf{a} = [(Q_{0.1}, -1), (Q_{0.9}, 1)]$  where  $Q_{0.1}$  is the 0.1 quantile in the data and  $Q_{0.9}$  is the 0.9 quantile. This mapping is also termed as robust-scaling as unlike  $z$ -score  $\frac{x-\mu}{\sigma}$ , it is resilient to outliers. On the downside it does not necessarily fix the first and second order statistics, but these are at least practically, bounded. The next step, i.e. squash mapping, makes sure that even outliers does not get too high values. For that purpose, we use the squash mapping

$$q(x) = \begin{cases} -\log(-x) - 1, & x < -1 \\ x, & -1 \leq x < 1 \\ \log(x) + 1, & x \geq 1 \end{cases} \quad (56)$$



---

## E. The Practical EGL Algorithm

---

### Algorithm 1 Explicit Gradient Learning

---

**Input:**  $x_0, \Omega, \tilde{\alpha}, \tilde{\varepsilon}, \gamma_\alpha < 1, \gamma_\varepsilon < 1, n_{\max}$

$k = 0$

$j = 0$

$\Omega_j \leftarrow \Omega$

Map  $h_0 : \Omega \rightarrow \mathbb{R}^n$

**while** *budget*  $C > 0$  **do**

**Explore:**

    Generate samples  $\mathcal{D}_k = \{\tilde{x}_i\}_1^m, \tilde{x}_i \in V_{\tilde{\varepsilon}}(\tilde{x}_k)$

    Evaluate samples  $y_i = f(h_0^{-1}(\tilde{x}_i)), i = 1, \dots, m$

    Add samples to the replay buffer  $\overline{\mathcal{D}} = \overline{\mathcal{D}} \cup \mathcal{D}_k$

**Output Map:**

$r_k = \text{squash} \circ l_{[Q_{0.1}, Q_{0.9}]}$

$\tilde{y}_i = r_k(y_i), i = 1, \dots, m$

**Mean-Gradient learning:**

$\theta_k = \arg \min_{\theta} \sum_{q=0}^{l-1} \sum_{i,j \in \mathcal{D}_{k-q}} |(\tilde{x}_j - \tilde{x}_i) \cdot g_{\theta}(\tilde{x}_i) - \tilde{x}_j + \tilde{x}_i|^2$

**Gradient Descent:**

$x_{k+1} \leftarrow x_k - \tilde{\alpha} g_{\theta_k}(x_k)$

**if**  $f(h_j^{-1}(\tilde{x}_{k+1})) > f(h_j^{-1}(\tilde{x}_k))$  **for**  $n_{\max}$  **times in a row then**

      Generate new trust-region s.t.  $|\Omega_{j+1}| = \gamma_\alpha |\Omega_j|$  and its center at  $x_{best}$

      Map  $h_j : \Omega \rightarrow \mathbb{R}^n$

$j \leftarrow j + 1$

$\tilde{\varepsilon} \leftarrow \gamma_\varepsilon \tilde{\varepsilon}$

**if**  $f(h_j^{-1}(\tilde{x}_{k+1})) < f(h_j^{-1}(\tilde{x}_k))$  **then**

$x_{best} = h_j^{-1}(\tilde{x}_k)$

$k \leftarrow k + 1$

**return**  $x_{best}$

---

---

## F. Supplementary details: The COCO experiment

The COCO test suite provides many Black-Box optimization problems on several dimensions (2,3,5,10,20,40). For each dimension, there are 360 distinct problems. The problems are divided into 24 different classes, each contains 15 problems. To visualize all problem classes, we iterate over the 2D problem set and for each class we present (Fig. 4-9) a contour plot, 3D plot and the equivalent 1D problem ( $f_{1D}(x) = f_{2D}(x, x)$ ) combined with the log view of the normalized problem ( $\frac{f_{1D}(x) - f_{1D}^{min}}{f_{1D}^{max} - f_{1D}^{min}}$ ).

To visualize the average convergence rate of each method, we first calculate a scaled distance between the best value at time  $t$  and the optimal value  $\Delta y_{best}^t = \frac{\min_{k < t} y_k - y^*}{y_0 - y^*}$  where  $y^*$  is the minimal value obtained from all the baselines' test-runs. We then average this number, for each  $t$ , over all runs in the same dimension problem set. This distance is now scaled from zero to one and the results are presented on a log-log scale. The first-column in Fig. 4-9 presents  $\overline{\Delta y_{best}^t}$  on each problem type of the 2D problem set and Fig. 10 show  $\overline{\Delta y_{best}^t}$  in the 40D problem set. In table 1, we present the hyperparameters used for EGL and IGL in all our experiments (besides the ablation tests).

In future work, we will need to design a better mechanism for the  $\varepsilon$  scheduling. In problem 19 (Griewank-Rosenbrock F8F2), the  $\varepsilon$  scheduling was too slow, and only when we used a smaller initial  $\varepsilon$ , EGL started to converge to the global minimum (see Fig. 11(a) where we used initial  $\varepsilon = 0.001 \times \sqrt{n}$ ,  $\gamma_\alpha = 0.7$  and  $L = 1$ ). On the other hand, in problems, 21 (Gallagher 101 peaks) and 22 (Gallagher 21 peaks) using small  $\varepsilon$  ends up in falling to local minima, and the choice of a larger  $\varepsilon$  could smooth the gradient which pushes  $x_k$  over the local minima (see 11(b-c) respectively where we used initial  $\varepsilon = 0.5 \times \sqrt{n}$  and  $L = 4$ ).

In Fig. 12-17 we present a histogram of the raw and scaled cost value (after the output-mapping) of a 200 samples snapshot from the replay buffer at different periods during the learning process ( $t = 1K$ ,  $t = 10K$ ,  $t = 100K$ ). Typically, we expect that problems with Normal or Uniform distributions should be easier to learn with a NN (e.g. problems 15 (Rastrigin), 18 (Schaffer F7, cond1000), 23 (ats ras)), while problems with skewed distribution or multimodal distribution are much harder (e.g. problems 2 (Ellipsoid separable), 10 (Ellipsoid) and 11 (Discus)). However, simply, mapping from a hard distribution into a Normal distribution is not necessarily a good choice since we lose the mapping linearity s.t. the scaled mean-gradient may not correspond to the true mean-gradient. Thus, the output-mapping must balance between linearity and normalization. In future work, we would like to find better, more robust output-mappings that overcome this problem. Understanding the way that the values are distributed at run-time could also help us define a better mechanism for deciding on  $\varepsilon$  and the RB size  $L$ . If the function outputs are close to each other, large RB could be beneficial, but if the values have high variance, large RB could add unnecessary noise.

Table 1. The COCO experiment Hyperparameters

| Parameter            | Value                 | Description                                                                                                               |
|----------------------|-----------------------|---------------------------------------------------------------------------------------------------------------------------|
| $n$                  | [2,3,5,10,20,40,784]  | coco space dimension                                                                                                      |
| $m$                  | 64                    | Exploration points                                                                                                        |
| $m_{warmup\_factor}$ | 5                     | $m \times m_{warmup\_factor}$ to adjust the network parameters around the TR initial point                                |
| batch                | 1024                  | Minibatch of EGL/IGL training                                                                                             |
| $L$                  | 32                    | Number of exploration steps that constitute the replay buffer for EGL/IGL<br>The replay memory size is: $RB = L \times m$ |
| $C$                  | $15 \times 10^4$      | Budget                                                                                                                    |
| $\alpha$             | $10^{-2}$             | Optimization steps' size                                                                                                  |
| g_lr                 | $10^{-3}$             | $g_\theta$ learning rate                                                                                                  |
| $\gamma_\alpha$      | 0.9                   | Trust region squeezing factor                                                                                             |
| $\gamma_\varepsilon$ | 0.97                  | $\varepsilon$ squeezing factor                                                                                            |
| $\varepsilon$        | $0.1 \times \sqrt{n}$ | Initial exploration size                                                                                                  |
| $n_{max}$            | 10                    | The number of times in a row that<br>$f(h_j^{-1}(\tilde{x}_{k+1})) > f(h_j^{-1}(\tilde{x}_k))$                            |
| $n_{min}$            | 40                    | Minimum gradient descent iterations                                                                                       |
| $p$                  | 0                     | Perturbation radius                                                                                                       |
| $g_\theta$           | Spline                | Network architecture (SPLINE/FC)                                                                                          |
| OM                   | log                   | Output Mapping                                                                                                            |
| OM_lr                | 0.1                   | Moving average learning rate for the Output Mapping                                                                       |
| N_minibatches        | 60                    | # of mini-batches for the mean-gradient learning in each $k$ step                                                         |
| $V_\varepsilon(x)$   | ball-explore          | $V_\varepsilon(x) = x + \varepsilon \times U[-1, 1]$ (see Sec. H for details)                                             |

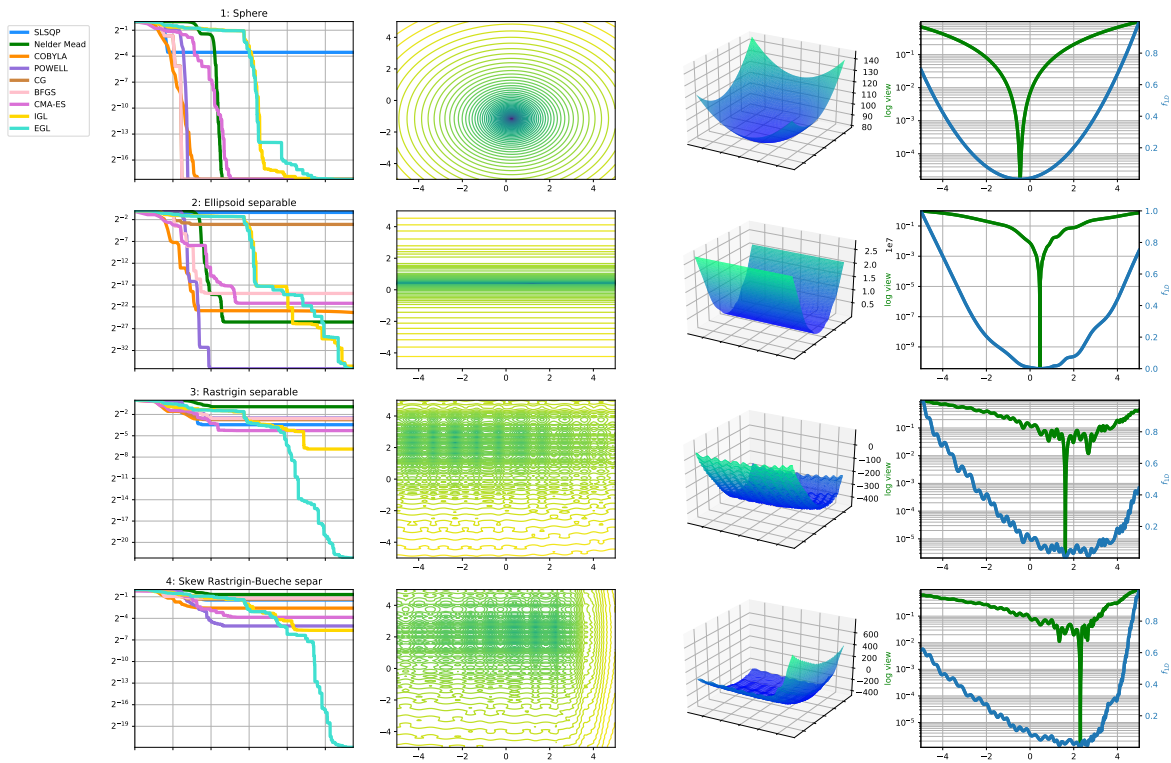

Figure 4. Visualization problems type 1-4 of 2D problems. First column: The scaled distance  $\overrightarrow{\Delta y}_{best}^t$ . Second column: Counter plot. Third column: 3D plot. Forth column: equivalent 1D problem with log view.

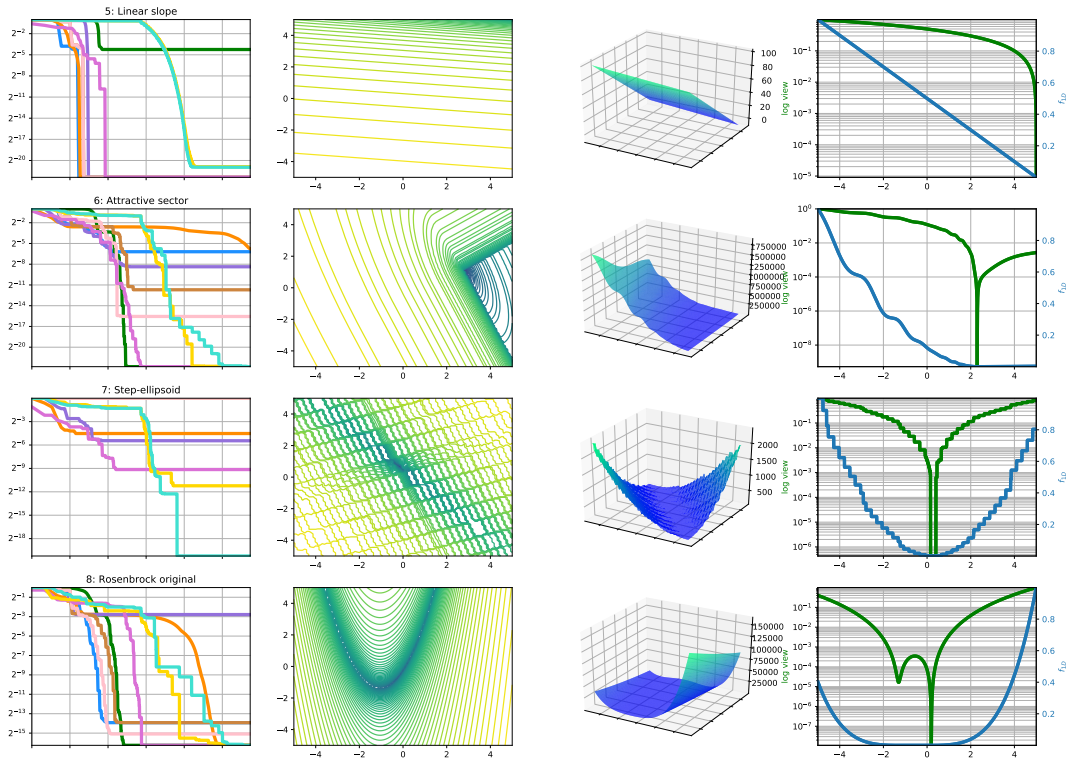

Figure 5. Visualization problems type 5-8 of 2D problems. First column: The scaled distance  $\overrightarrow{\Delta y}_{best}^t$ . Second column: Counter plot. Third column: 3D plot. Forth column: equivalent 1D problem with log view.

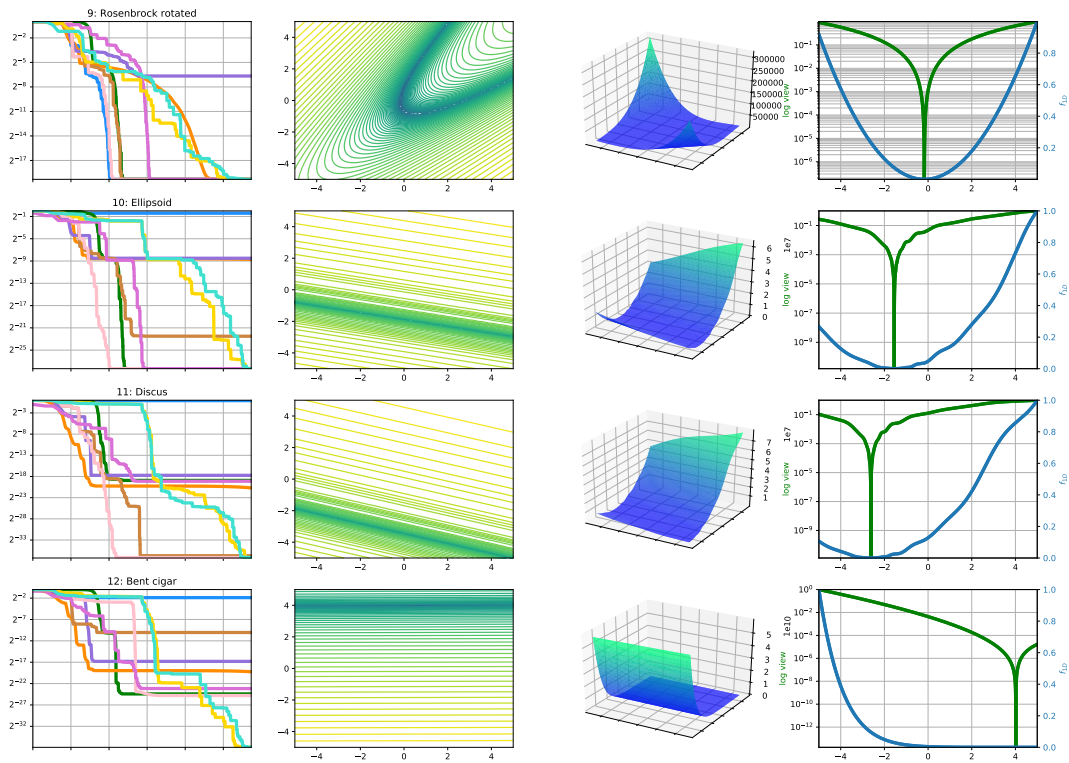

Figure 6. Visualization problems type 9-12 of 2D problems. First column: The scaled distance  $\overline{\Delta y}_{best}^t$ . Second column: Counter plot. Third column: 3D plot. Forth column: equivalent 1D problem with log view.

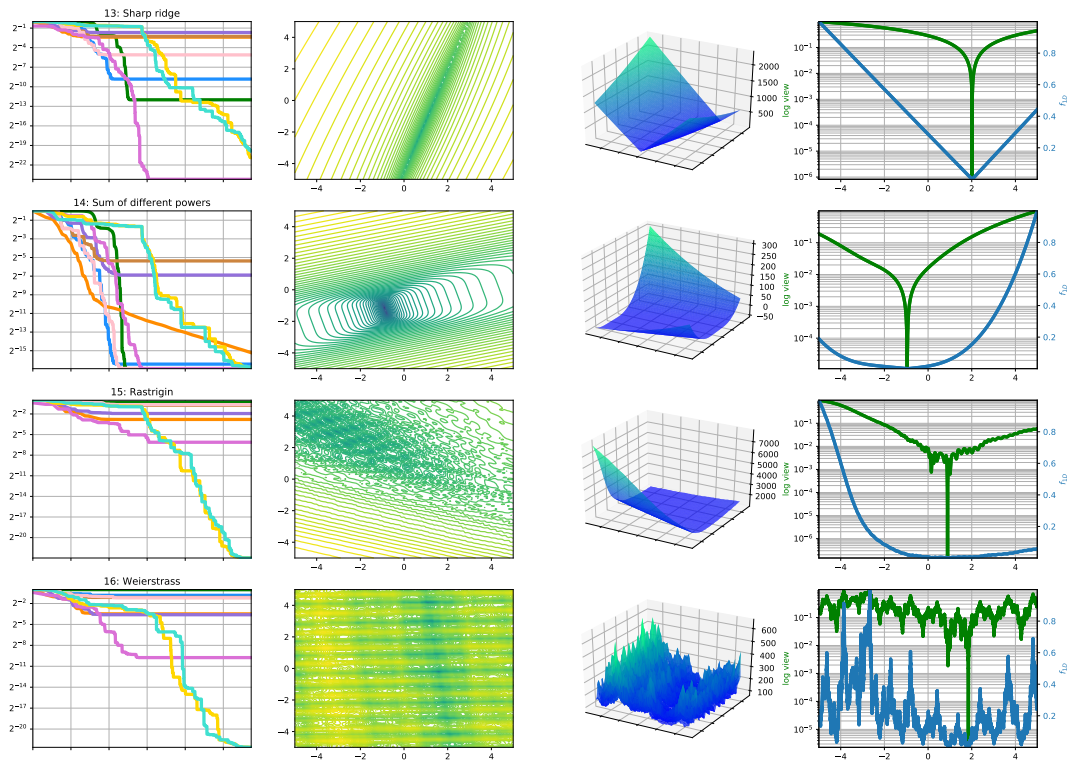

Figure 7. Visualization problems type 13-16 of 2D problems. First column: The scaled distance  $\overline{\Delta y}_{best}^t$ . Second column: Counter plot. Third column: 3D plot. Forth column: equivalent 1D problem with log view.

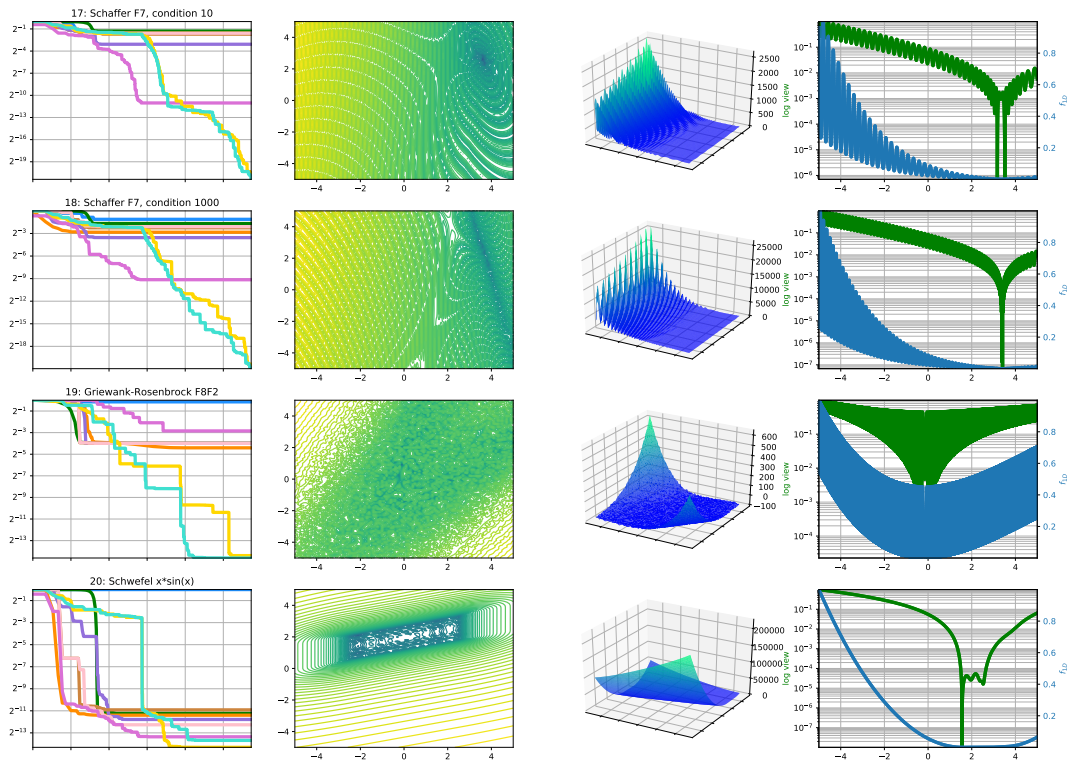

Figure 8. Visualization problems type 17-20 of 2D problems. First column: The scaled distance  $\overline{\Delta y}_{best}^t$ . Second column: Counter plot. Third column: 3D plot. Forth column: equivalent 1D problem with log view.



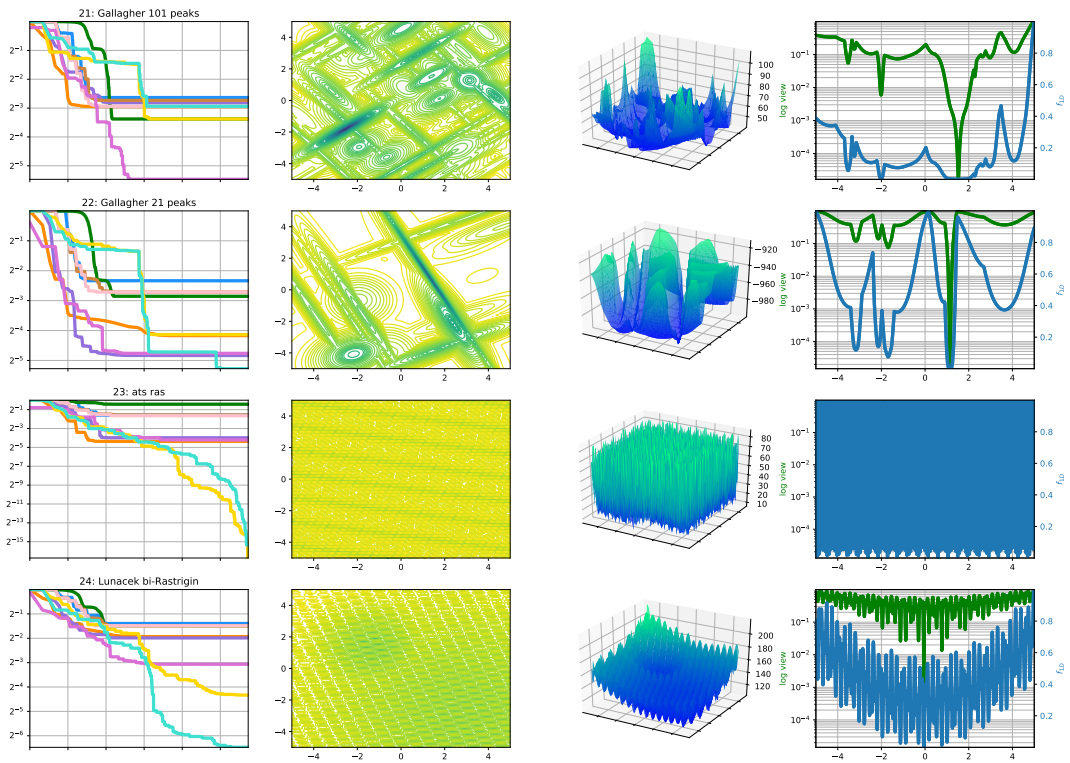

Figure 9. Visualization problems type 21-24 of 2D problems. First column: The scaled distance  $\overline{\Delta y}_{best}^t$ . Second column: Counter plot. Third column: 3D plot. Forth column: equivalent 1D problem with log view.

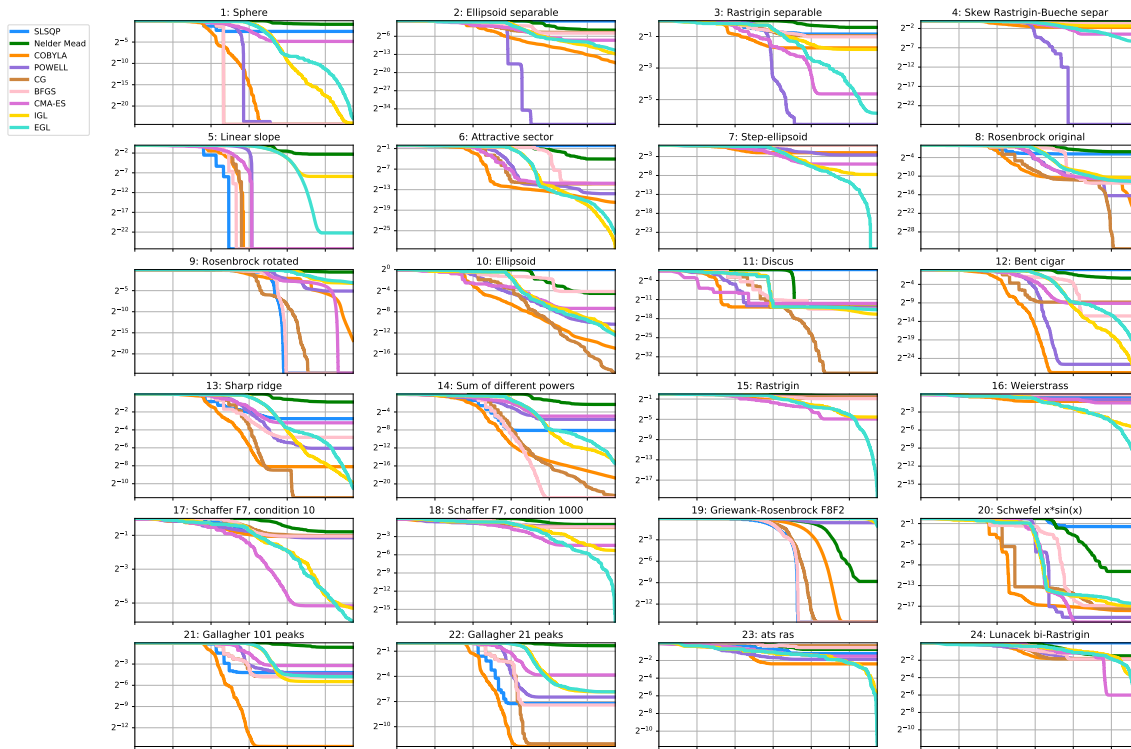

Figure 10. The scaled distance  $\overline{\Delta y_{best}^t}$  per problem type on 40D

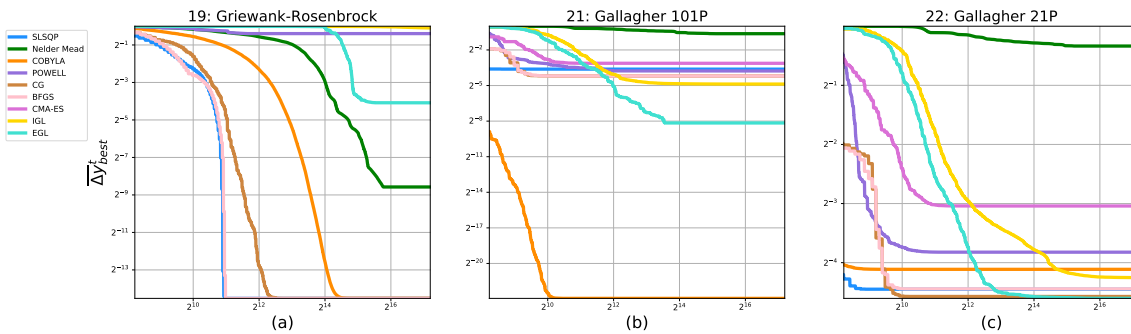

Figure 11. The scaled distance  $\overline{\Delta y_{best}^t}$  with different  $\epsilon$  on 40D. (a) problem type 19, (b) problem type 21, (c) problem type 22

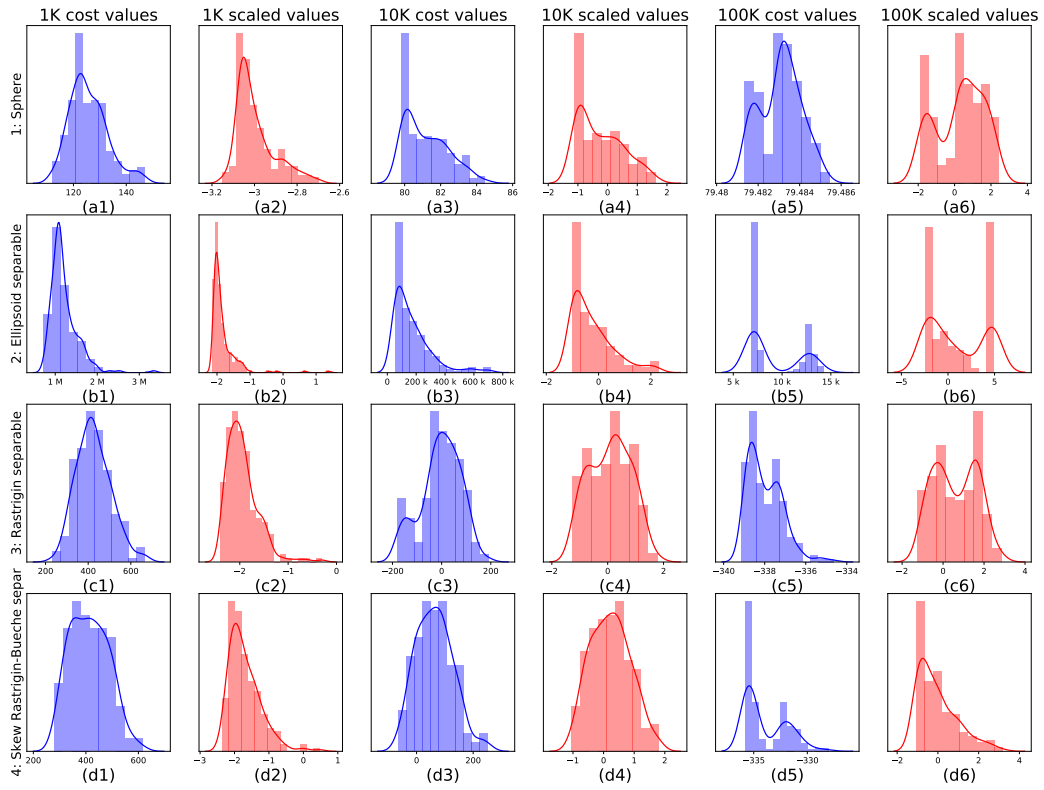

Figure 12. Histogram plot of a snapshot of 200 samples from the RB around different times ( $t = 1K$ ,  $t = 10K$ ,  $t = 100K$ ) with and without OM for problems 1-4

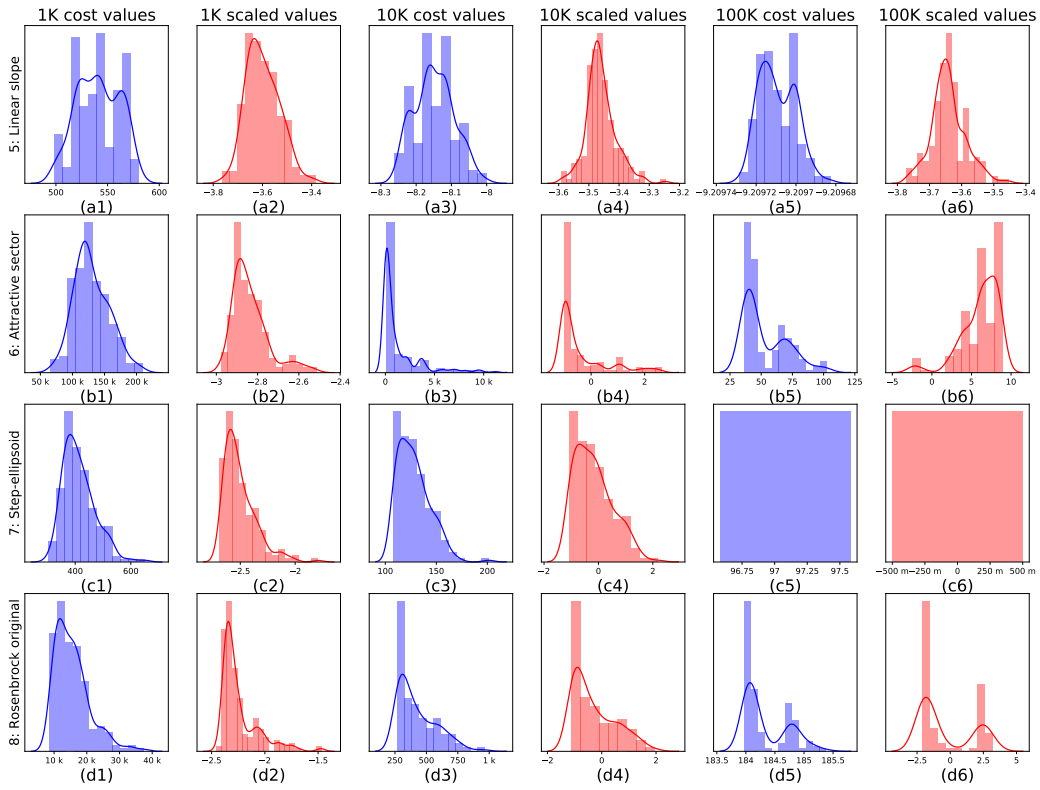

Figure 13. Histogram plot of a snapshot of 200 samples from the RB around different times ( $t = 1K$ ,  $t = 10K$ ,  $t = 100K$ ) with and without OM for problems 5-8

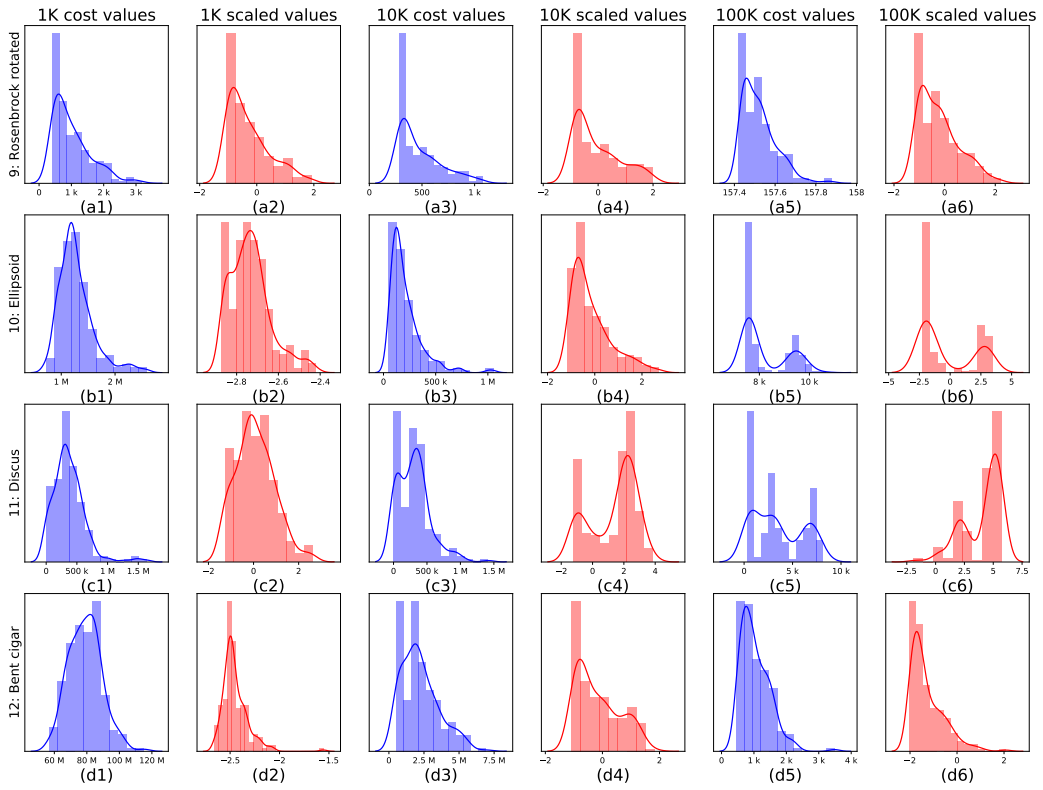

Figure 14. Histogram plot of a snapshot of 200 samples from the RB around different times ( $t = 1K$ ,  $t = 10K$ ,  $t = 100K$ ) with and without OM for problems 9-12

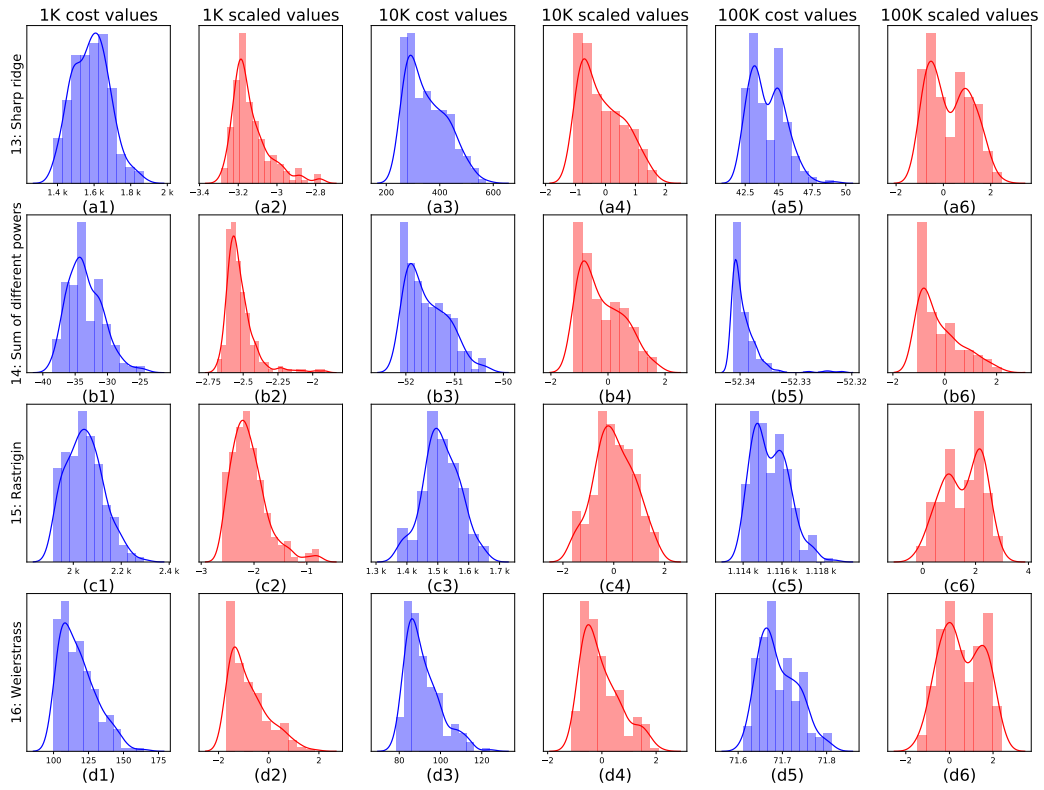

Figure 15. Histogram plot of a snapshot of 200 samples from the RB around different times ( $t = 1K$ ,  $t = 10K$ ,  $t = 100K$ ) with and without OM for problems 13-16

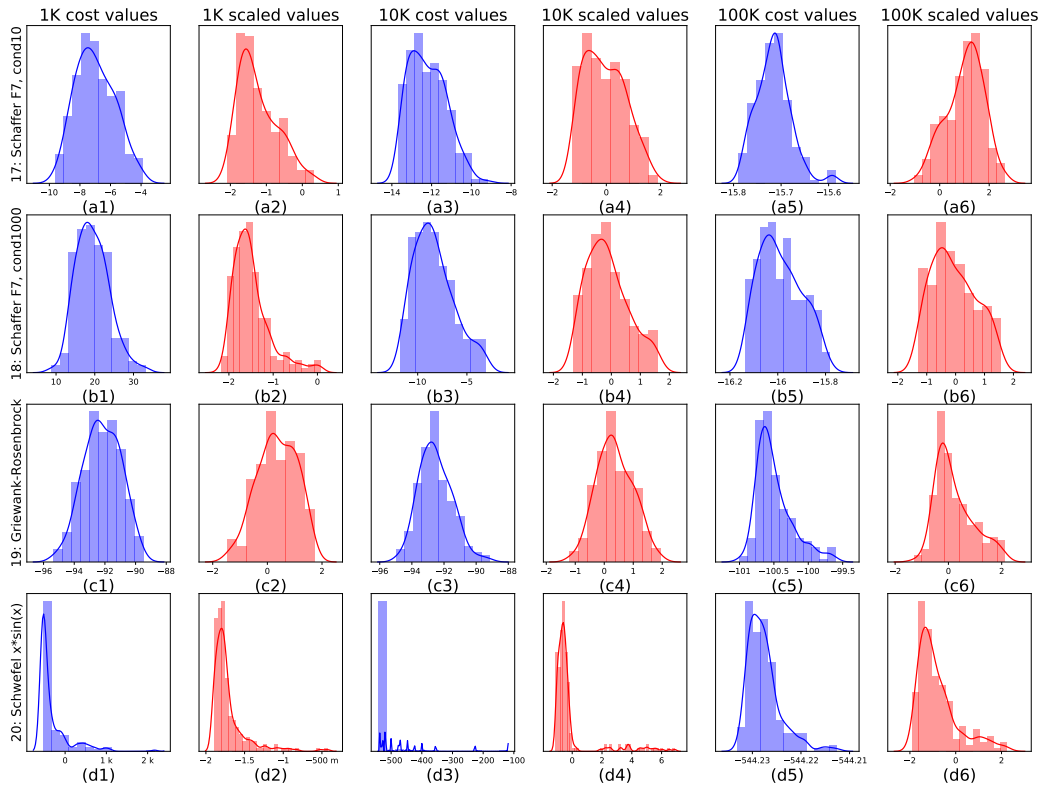

Figure 16. Histogram plot of a snapshot of 200 samples from the RB around different times ( $t = 1K$ ,  $t = 10K$ ,  $t = 100K$ ) with and without OM for problems 17-20

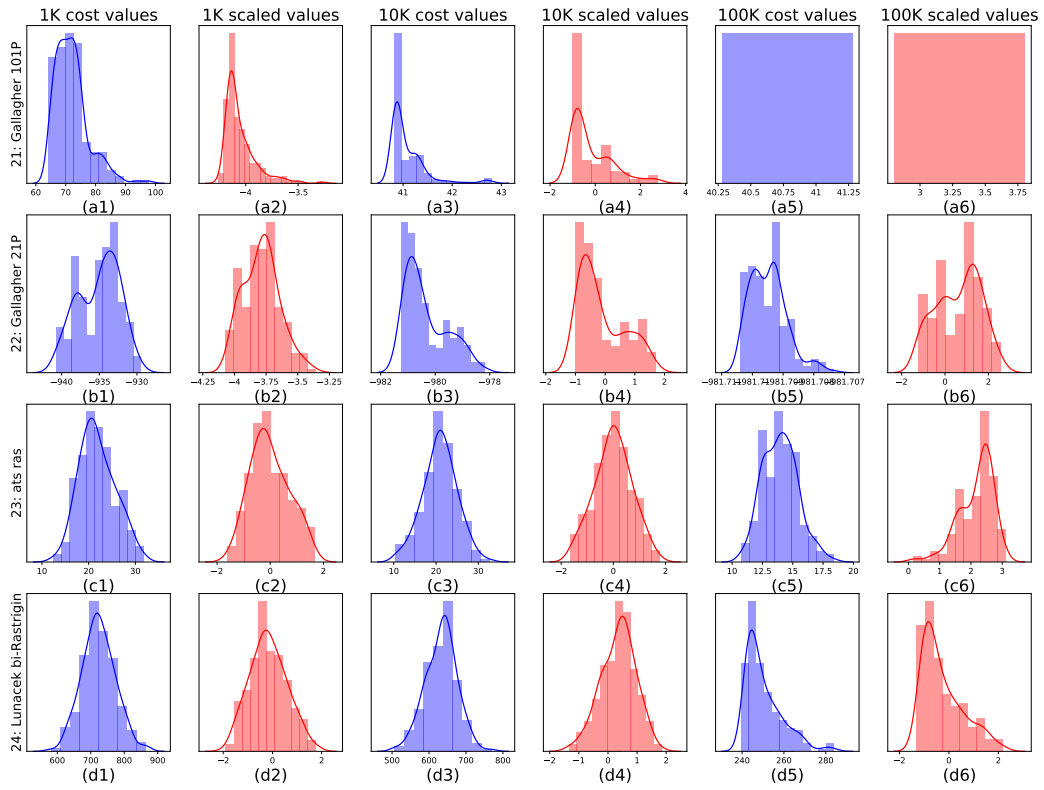

Figure 17. Histogram plot of a snapshot of 200 samples from the RB around different times ( $t = 1K$ ,  $t = 10K$ ,  $t = 100K$ ) with and without OM for problems 21-24



## G. Supplementary details: latent space search

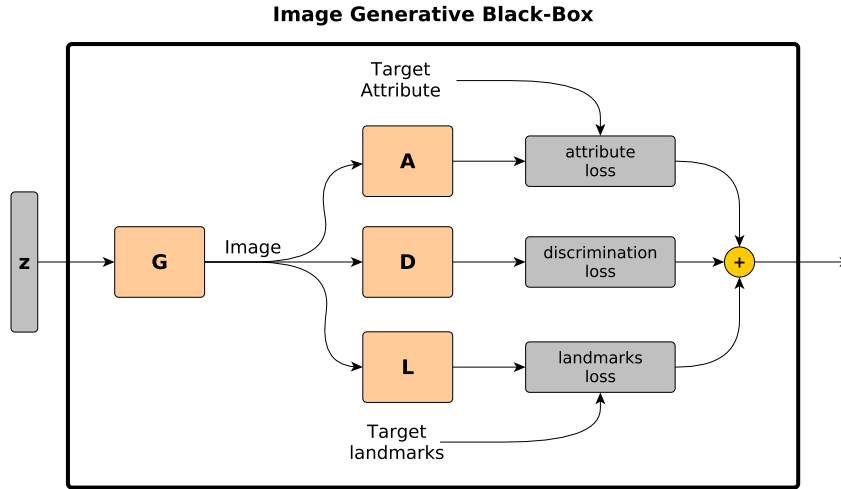

Figure 18. The image-generative BBO task

In this experiment, the task is to utilize a pre-trained Black-Box face image generator and generate a realistic face image with target face attributes and face landmark points. Formally, we have 4 Black-Box networks that constitute our BBO problem:

1. Generator  $G : z \rightarrow x$ , where  $z \sim \mathcal{N}(0, \mathbf{I}_n)$  and  $x$  is an RGB image with  $H = 218, W = 178$ .
2. Discriminator  $D : x \rightarrow \mathbb{R}$  s.t. positive  $D(x)$  indicate poor fake images while negative  $D(x)$  indicates real or a good fake image.
3. Attribute Classifier  $A : x \rightarrow \mathbb{R}^{40}$  where each element in  $A(x)$  is the probability of a single attribute (out of 40 different attributes).
4. Landmark points Estimator  $L : x \rightarrow \mathbb{R}^{68}$  predicts the location of 68 different landmark points.

In addition, every BBO problem is characterized by two external parameters

1. Target attributes  $a$  a vector of 40 Booleans.
2. Target landmark points  $l \in \mathbb{R}^{68}$  a vector of 68 landmark points locations.

The overall cost function is defined as

$$f_{al}(z) = \lambda_a \mathcal{L}_a(G(z)) + \lambda_l \mathcal{L}_l(G(z)) + \lambda_g \tanh(D(G(z)))$$

Where:

1.  $\mathcal{L}_a$  is the Cross-Entropy loss between the generated face attributes as measured by the classifier and the desired set of attributes  $a$ .
2.  $\mathcal{L}_l$  is the MSE between the generated landmark points and the desired set of landmarks  $l$ .
3.  $D(G(z))$  is the discriminator output, positive for low-quality images and negative for high-quality images.

The objective is to find  $z^*$  that minimizes  $f_{al}$ . A graphical description of the BBO problem is given in Fig. 18. We used a constant starting point  $z_0$ , sampled from  $\mathcal{N}(0, \mathbf{I}_n)$  for all our runs. To generate different problems, we sampled a target

Table 2. Latent-Space Search Hyperparameters

| Parameter            | Value            | Description                                                                                                               |
|----------------------|------------------|---------------------------------------------------------------------------------------------------------------------------|
| $n$                  | 512              | Latent space dimension                                                                                                    |
| $\lambda_a$          | 1                | Attributes score weight                                                                                                   |
| $\lambda_d$          | 2                | Discriminator score weight                                                                                                |
| $\lambda_l$          | 100              | Landmarks score weight                                                                                                    |
| $m$                  | 32               | Exploration points                                                                                                        |
| batch                | 1024             | Minibatch of EGL/IGL training                                                                                             |
| $L$                  | 64               | Number of exploration steps that constitute the replay buffer for EGL/IGL<br>The replay memory size is: $RB = L \times m$ |
| $C$                  | $10^4$           | Budget                                                                                                                    |
| $\phi$               | $\frac{2}{3}\pi$ | Cone exploration angle                                                                                                    |
| $\alpha$             | 0.02             | Optimization steps' size                                                                                                  |
| g_lr                 | $10^{-3}$        | $g_\theta$ learning rate                                                                                                  |
| $\gamma_\alpha$      | 0.9              | Trust region squeezing factor                                                                                             |
| $\gamma_\varepsilon$ | 0.95             | $\varepsilon$ squeezing factor                                                                                            |

image  $x_T$  from the CelebA dataset. We used its attributes as the target attribute and used its landmark points estimation  $l = L(x_T)$  as the target landmarks. Note that the target image  $x_T$  was never revealed to the EGL optimizer, only its attributes and landmark points.

We applied the same EGL algorithm as in the COCO experiment with the Spline Embedding network architecture and with two notable changes: (1) a set of slightly modified hyperparameters (See Table 2); and (2) a modified exploration domain  $V_\varepsilon$ . The main reason for these adjustments was the high computational cost (comparing to the COCO experiment) of each different  $z$  vector. This led us to squeeze the budget  $C$  to only  $10^4$  evaluations and the number of exploration points to only  $m = 32$ . For such a low number of exploration points around each candidate (in a  $n = 512$  dimension space), we designed an exploration domain  $V_\varepsilon$ , termed *cone-explore* which we found out to be more efficient than the uniform exploration inside an  $n$ -ball with  $\varepsilon$  radius that was executed in the COCO experiment. A description of the cone-explore method is given in Sec. H.

Additional results of EGL and IGL are given in Fig. 21 and Fig. 22. We also evaluated two classical algorithms: GC and CMA-ES, both provided unsatisfying results (see Fig. 20). We observed that CG converged to local minima around the initial point  $z_0$  while CMA-ES converged to points that have close landmark point but poor discrimination score. We did not investigate into this phenomena but we postulate that it is the result of different landscapes statistics of the two factors in the cost function, i.e.  $\mathcal{L}_l(G(z))$  and  $\tanh(D(G(z)))$  which fool the CMA-ES algorithm.

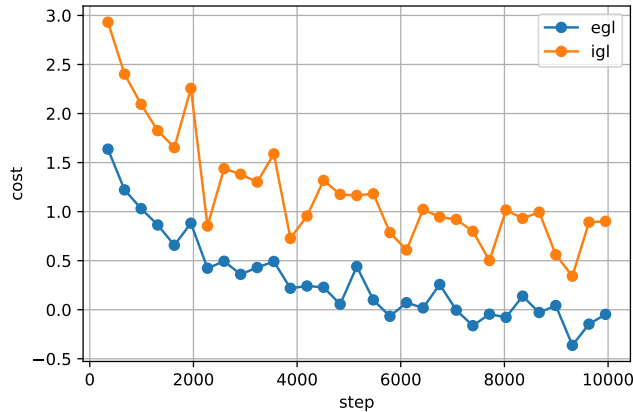

Figure 19. Average cost during training.

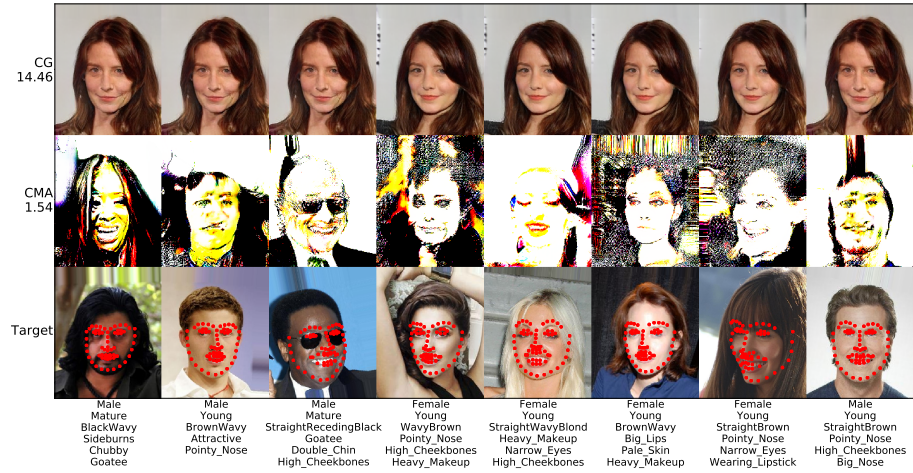

Figure 20. Baselines results: CG and CMA

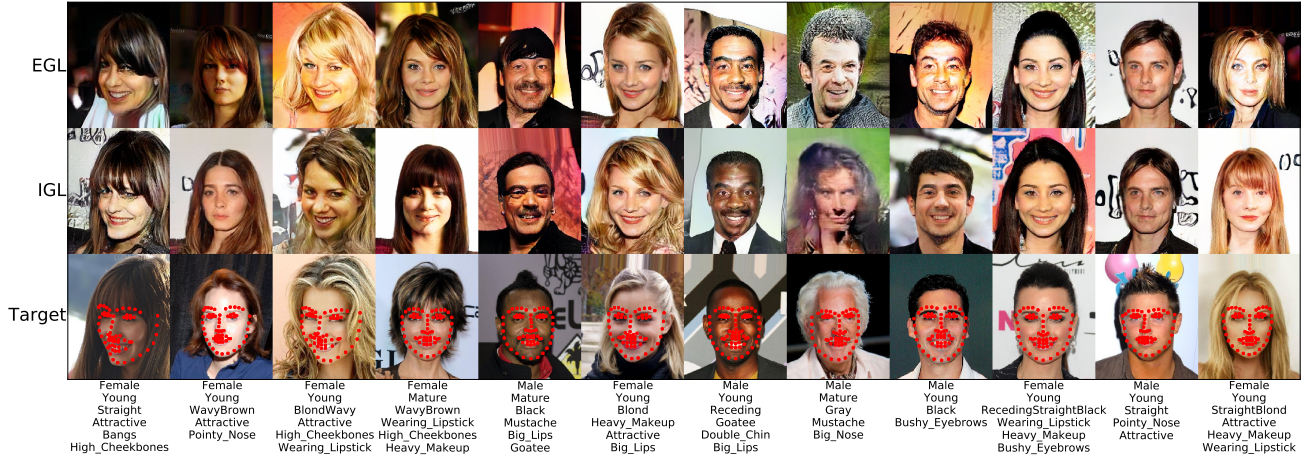

Figure 21. Searching latent space of generative models with EGL and IGL

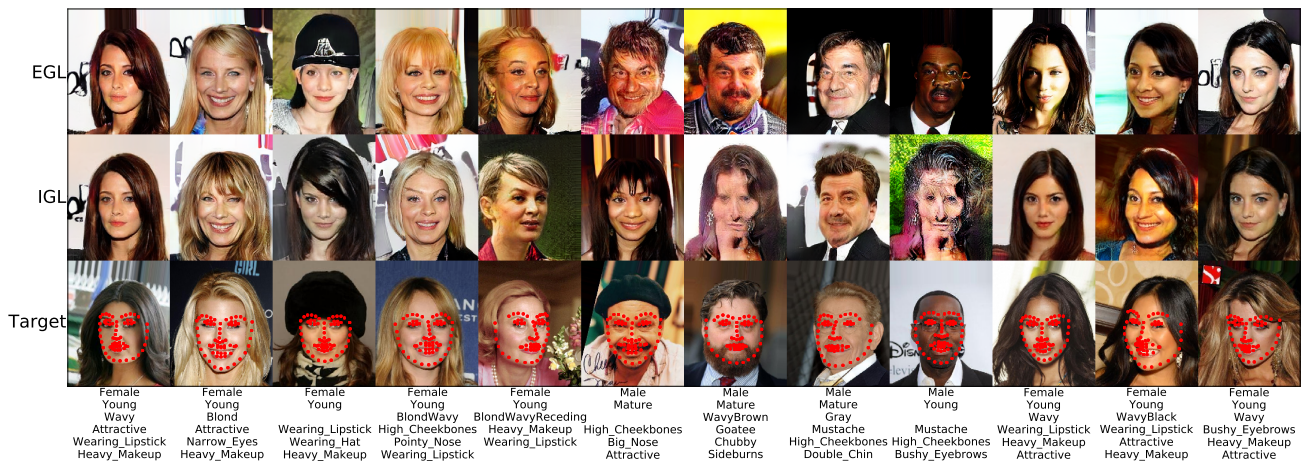

Figure 22. Searching latent space of generative models with EGL and IGL

## H. Gradient Guided Exploration

In high-dimensional problems and low budgets, sampling  $n + 1$  exploration points for each new candidate  $x_k$  may consume the entire budget too fast without being able to take enough optimization steps. In practice, EGL works even with  $m \ll n + 1$  exploration points, however, we observed that one can improve the efficiency when  $m \ll n + 1$  by sampling the exploration points non uniformly around the candidate  $x_k$ . Specifically, using the previous estimation of the gradient to determine the search direction. Hence, we term this approach as *gradient guided exploration*.

In the COCO experiment (Sec. 5) we sampled the exploration points uniformly around each candidate. In other words, our  $V_\varepsilon$  domain was an  $n$ -ball with  $\varepsilon$  radius, we term this method as *ball-explore*. Ball-explore does not make any assumptions on the gradient direction at  $x_k$  and does not use any a-priori information. However, for continuous gradients, we do have a-priori information on the gradient direction as we have our previous estimator  $g_{\theta_{k-1}}$ . Since  $x_k$  is relatively close to  $x_{k-1}$ , the learned model  $g_{\theta_{k-1}}$  can be used as a first-order approximation for the gradient in  $x_k$ , i.e.  $g_{\theta_{k-1}}(x_k)$ .

If  $g_{\theta_{k-1}}(x_k)$  is a good approximation for  $g_\varepsilon(x_k)$ , then sampling points in a perpendicular direction to the mean-gradient, i.e.  $x$  s.t.  $(x - x_k) \cdot g_{\theta_{k-1}}(x_k) = 0$ , adds little information since  $f(x) - f(x_k) \approx 0$  so the loss  $|(x - x_k) \cdot g_{\theta_{k-1}}(x_k) - f(x) + f(x_k)|^2$  is very small. Therefore, we experimented with sampling points inside the intersection of a  $n$ -ball  $B_\varepsilon(x_k)$  and a cone with apex at  $x_k$ , direction  $-g_{\theta_{k-1}}(x_k)$  and some hyperparameter cone-angle of  $\phi$ . The distance vector  $x - x_k$  of a point inside such a cone has high cosine similarity with the mean-gradient and we postulate that this should improve the efficiency of the learning process. We term this alternative exploration method as *cone-explore* and denote the cone domain as  $C_\varepsilon^\phi(x, g_{\theta_{k-1}}(x_k))$ .

For high dimensions, cone-explore significantly reduces the exploration volume. A simple upper bound for the cone-to-ball volume ratio show that it decays exponentially in  $n$

$$\frac{|C_\varepsilon^\phi|}{|B_\varepsilon|} \leq \frac{\sqrt{\pi} \Gamma(\frac{n+1}{2})}{n \Gamma(\frac{n}{2} + 1)} (\sin \phi)^{n-1} \quad (57)$$

Unfortunately, cone-explore is not suitable for non-continuous gradients or too large optimization steps. To take into account gradient discontinuities, we suggest to sample half of the points inside the cone and half inside an  $n$ -ball.

In Fig. 23 we present an ablation test in the 784D COCO problem set of cone-explore and  $\frac{1}{2}$ -cone- $\frac{1}{2}$ -ball explore with respect to the standard ball-explore. In this experiment, we used only  $m = 32$  exploration points around each candidate. The results show that sampling half of the exploration points inside a cone improved the results by 18%. We found out that the strategy also improves the results in the latent space search experiment, yet we did not conduct a full ablation test.

On the downside, we found out that if  $m \approx n$  then cone-explore hurts the performance. We hypothesize that near local minima, where the exact direction of the gradient is important, the mean-gradient learned with cone-explore has lower accuracy and therefore, ball-explore with sufficient sampling points converges to better solutions.

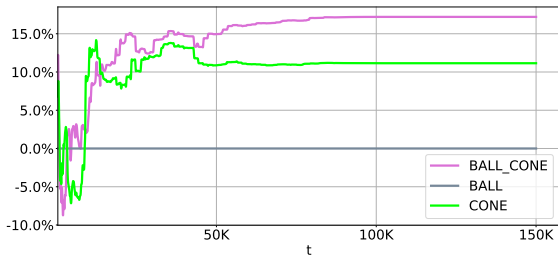

Figure 23. Ablation test on the 784D COCO problem set: Cone-explore vs Ball-explore

---

## References

- Audet, C. and Hare, W. *Derivative-free and blackbox optimization*. Springer, 2017.
- He, K., Zhang, X., Ren, S., and Sun, J. Deep residual learning for image recognition. In *Proceedings of the IEEE conference on computer vision and pattern recognition*, pp. 770–778, 2016.
- Howard, J. and Gugger, S. fastai: A layered api for deep learning. *arXiv preprint arXiv:2002.04688*, 2020.
- Kingma, D. P. and Ba, J. Adam: A method for stochastic optimization. *arXiv preprint arXiv:1412.6980*, 2014.
- Loomis, L. H. and Sternberg, S. *Advanced calculus*. World Scientific, 1968.
- Miyato, T., Kataoka, T., Koyama, M., and Yoshida, Y. Spectral normalization for generative adversarial networks. *arXiv preprint arXiv:1802.05957*, 2018.
- Reinsch, C. H. Smoothing by spline functions. *Numerische mathematik*, 10(3):177–183, 1967.
- Wang, X., Girshick, R., Gupta, A., and He, K. Non-local neural networks. In *Proceedings of the IEEE conference on computer vision and pattern recognition*, pp. 7794–7803, 2018.
- Zhang, W., Du, T., and Wang, J. Deep learning over multi-field categorical data. In *European conference on information retrieval*, pp. 45–57. Springer, 2016.
